# Supplementary material
Source: PubMed Central journal article supplement (PMC6878177)

## Supplemental materials for “Accuracy of the Quantitative Fecal Immunochemical Test...”

Supplemental materials:

Table 1: Search strategies, pages 2-6

Table 2: Studies excluded because of overlap of study population, pages 7-9

Table 3: Prevalence of colorectal cancer and advanced adenomas in screening populations undergoing colonoscopy, based on pooling of relevant cohort studies, page 10

Figure 1: PRISMA flow chart detailing study selection, page 11

Table 4: Detailed information about included studies, pages 12-31

Figure 2: QUADAS overview, page 32

Table 5: Detailed QUADAS assessment for individual studies, pages 33-34

Figures 3A-D: Colorectal cancer detection at varying quantitative thresholds using all available positivity thresholds, from studies with colonoscopy follow-up, pages 35-36

Figures 4A-D: Advanced adenoma detection at varying quantitative thresholds using all available positivity thresholds, from studies with colonoscopy follow-up, pages 37-38

Figure 5: Colorectal cancer detection, using the primary positivity threshold from all included studies, page 39

Figure 6: Summary receiver operating characteristic for colorectal cancer detection, using the primary positivity threshold of all included studies, page 40

Figure 7: Sensitivity analyses for sensitivity and specificity of FIT for colorectal cancer based on exclusion of select studies, page 41

Figure 8: Figure 8: Advanced adenoma detection, using the primary positivity threshold of all studies reporting sensitivity and specificity for advanced adenomas, page 42

Figure 9: Summary receiver operating characteristic curve for advanced adenoma detection, using the primary positivity threshold of all included studies, page 43

Figures 10A-B: Colorectal cancer detection of the OC-Sensor test using all available positivity thresholds from only studies with colonoscopy follow-up, pages 44-45

Figures 11A-B: Advanced adenoma detection of the OC-Sensor test using all available positivity thresholds from only studies with colonoscopy follow-up, page 46

Figures 12A-B: Sensitivity and specificity of FIT for colorectal cancer stratified by sex and age, pages 47-48

Table 1: Search strategies

| Search Engine | Terms used                                                                                                                                                                                                                                                                                                                                                                                                                                                                                                               |
|---------------|--------------------------------------------------------------------------------------------------------------------------------------------------------------------------------------------------------------------------------------------------------------------------------------------------------------------------------------------------------------------------------------------------------------------------------------------------------------------------------------------------------------------------|
| EMBASE        | #1 Fecal<br>#2 faecal<br>#3 feces<br>#4 #1 OR #2 OR #3<br>#5 'immunochemistry'/exp<br>#6 immunochem*<br>#7 #5 OR #6<br>#8 #4 AND #7<br>#9 fit:ab,ti<br>#10 guaiac:ab,ti<br>#11 'occult blood'<br>#12 fobt*<br>#13 fob*<br>#14 ifobt<br>#15 ifob*<br>#16 #6 OR #8 OR #9 OR #10 OR #11 OR #12 OR #13<br>OR #14 OR #15<br>#17 insure<br>#18 inform<br>#19 #17 OR #18<br>(insure OR inform)<br>#20 #16 AND #19 AND (insure OR inform)<br>#21 'instant view'<br>#22 hemoccult<br>#23 immocare<br>#24 flexsure<br>#25 monohaem |

|     |                                                                                                                                                 |
|-----|-------------------------------------------------------------------------------------------------------------------------------------------------|
| #26 | hemasure                                                                                                                                        |
| #27 | occultech                                                                                                                                       |
| #28 | quickvue                                                                                                                                        |
| #29 | clearview                                                                                                                                       |
| #30 | hemoquant                                                                                                                                       |
| #31 | 'hema screen'                                                                                                                                   |
| #32 | innovacon                                                                                                                                       |
| #33 | 'oc micro'                                                                                                                                      |
| #34 | 'oc sensor'                                                                                                                                     |
| #35 | 'oc hemodia'                                                                                                                                    |
| #36 | 'oc light'                                                                                                                                      |
| #37 | aimstep                                                                                                                                         |
| #38 | magstream                                                                                                                                       |
| #39 | immudia                                                                                                                                         |
| #40 | #16 OR #20 OR #21 OR #22 OR #23 OR #24 OR #25 OR #26 OR #27 OR #28 OR #29 OR #30 OR #31 OR #32 OR #33 OR #34 OR #35 OR #36 OR #37 OR #38 OR #39 |
| #41 | 'predictive value'/de                                                                                                                           |
| #42 | 'sensitivity and specificity'/de                                                                                                                |
| #43 | 'laboratory diagnosis'/exp                                                                                                                      |
| #44 | 'reproducibility'/de                                                                                                                            |
| #45 | 'reference value'/de                                                                                                                            |
| #46 | 'diagnostic error'/exp                                                                                                                          |
| #47 | 'diagnostic test accuracy study'/de                                                                                                             |
| #48 | 'diagnostic accuracy'/de                                                                                                                        |
| #49 | 'diagnostic value'/de                                                                                                                           |
| #50 | 'standard'/de                                                                                                                                   |
| #51 | 'gold standard'/de                                                                                                                              |
| #52 | 'observer variation'/de                                                                                                                         |
| #53 | 'health care quality'/de                                                                                                                        |
| #54 | 'biomedical technology assessment'/de                                                                                                           |
| #55 | 'clinical effectiveness'/de                                                                                                                     |

|                                                                                                                                                                                                                                                                    |
|--------------------------------------------------------------------------------------------------------------------------------------------------------------------------------------------------------------------------------------------------------------------|
| #56 'clinical indicator'/de                                                                                                                                                                                                                                        |
| #57 'medical error'/exp                                                                                                                                                                                                                                            |
| #58 'root cause analysis'/de                                                                                                                                                                                                                                       |
| #59 'good laboratory practice'/de                                                                                                                                                                                                                                  |
| #60 'validation process'/de                                                                                                                                                                                                                                        |
| #61 sensitiv*:ab,ti                                                                                                                                                                                                                                                |
| #62 specificit*:ab,ti                                                                                                                                                                                                                                              |
| #63 'predictive value':ab,ti                                                                                                                                                                                                                                       |
| #64 accurac*:ab,ti                                                                                                                                                                                                                                                 |
| #65 (false NEXT/1 positive*):ab,ti                                                                                                                                                                                                                                 |
| #66 (false NEXT/1 negative*):ab,ti                                                                                                                                                                                                                                 |
| #67 (miss NEXT/1 rate*):ab,ti                                                                                                                                                                                                                                      |
| #68 (error NEXT/1 rate*):ab,ti                                                                                                                                                                                                                                     |
| #69 (detection NEXT/1 rate*):ab,ti                                                                                                                                                                                                                                 |
| #70 (diagnostic NEXT/1 yield*):ab,ti                                                                                                                                                                                                                               |
| #71 (likelihood NEXT/1 ratio*):ab,ti                                                                                                                                                                                                                               |
| #72 'odds ratio':ab,ti AND diagnosis:ab,ti                                                                                                                                                                                                                         |
| #73 risk:ab,ti AND diagnosis:ab,ti                                                                                                                                                                                                                                 |
| #74 'diagnostic odds ratio':ab,ti OR 'diagnostic odds ratios':ab,ti                                                                                                                                                                                                |
| #75 'diagnostic accuracy'                                                                                                                                                                                                                                          |
| #76 'reference standard':ab,ti OR 'reference standards':ab,ti                                                                                                                                                                                                      |
| #77 #41 OR #42 OR #43 OR #44 OR #45 OR #46 OR #47 OR #48 OR #49 OR #50 OR #51 OR #52 OR #53 OR #54<br>OR #55 OR #56 OR #57 OR #58 OR #59 OR #60 OR #61 OR #62 OR #63 OR #64 OR #65 OR #66 OR #67 OR #68<br>OR #69 OR #70 OR #71 OR #72 OR #73 OR #74 OR #75 OR #76 |
| #78 #40 AND #77                                                                                                                                                                                                                                                    |
| #79 'colon tumor'/exp                                                                                                                                                                                                                                              |
| #80 'rectum tumor'/exp                                                                                                                                                                                                                                             |
| #81 'intestine polyp'/exp                                                                                                                                                                                                                                          |
| #82 'colon polyp'/exp                                                                                                                                                                                                                                              |
| #83 'colon cancer':ab,ti                                                                                                                                                                                                                                           |
| #84 'colonic cancer':ab,ti                                                                                                                                                                                                                                         |

Supplemental materials for “Accuracy of the Quantitative Fecal Immunochemical Test...”

|        |                                                                                                                                                                                                                                                                                                                                                                                                                                                                                                                                                                                                                                                                                                                                                                                                                                                                                                                                                                                                                                                                                                                                                                                                                                                                                                                                                                                                                                                                                      |
|--------|--------------------------------------------------------------------------------------------------------------------------------------------------------------------------------------------------------------------------------------------------------------------------------------------------------------------------------------------------------------------------------------------------------------------------------------------------------------------------------------------------------------------------------------------------------------------------------------------------------------------------------------------------------------------------------------------------------------------------------------------------------------------------------------------------------------------------------------------------------------------------------------------------------------------------------------------------------------------------------------------------------------------------------------------------------------------------------------------------------------------------------------------------------------------------------------------------------------------------------------------------------------------------------------------------------------------------------------------------------------------------------------------------------------------------------------------------------------------------------------|
|        | <p>#85 'colorectal cancer':ab,ti<br/>                 #86 'colon neoplasm':ab,ti<br/>                 #87 'colonic neoplasm':ab,ti<br/>                 #88 'colorectal neoplasm':ab,ti<br/>                 #89 adenoma*:ab,ti<br/>                 #90 'colon polyp':ab,ti<br/>                 #91 'colonic polyp':ab,ti<br/>                 #92 'colorectal polyp':ab,ti<br/>                 #93 #79 OR #80 OR #81 OR #82 OR #83 OR #84 OR<br/>                 #85 OR #86 OR #87 OR #88 OR #89 OR #90 OR #91 OR #92<br/>                 #94 #78 AND #93<br/>                 #95 #78 AND #93 AND [english]/lim<br/>                 #96 #78 AND #93 AND [english]/lim NOT ([animals]/lim NOT ([humans]/lim OR 'patient'/exp))<br/>                 #97 #78 AND #93 AND [english]/lim NOT ([animals]/lim NOT ([humans]/lim OR 'patient'/exp)) NOT 'conference abstract'/it<br/>                 #98 #78 AND #93 AND [english]/lim NOT ([animals]/lim NOT ([humans]/lim OR 'patient'/exp)) NOT 'conference abstract'/it AND [2008-2012]/py</p>                                                                                                                                                                                                                                                                                                                                                                                                                                 |
| Pubmed | <p>(((((immunochemi* OR FIT OR guaiac OR "occult blood" OR FOBT* OR FOB* OR ifobt OR iFOB*) OR ((immunochemi* OR FIT OR guaiac OR "occult blood" OR FOBT* OR FOB* OR ifobt OR iFOB*) AND (insure OR inform)) OR ("Instant-view" OR instant view OR hemocult OR immocare OR flexure OR monohaem OR hemopure OR occlutech OR quickvue OR clearview OR hemoquant OR "Hema screen" OR hema-screen OR innovation OR oc-micro OR "OC Micro" OR oc-sensor OR "OC Sensor" OR "OC-Hemodia" OR "OC Hemodia OR " oc-light "OR " oc light OR kimstep OR mainstream OR immudia)) AND ( "2008/01/01"[PDat] : "2012/12/31"[PDat] ))) AND (((("predictive value of tests"[mh] OR "Sensitivity and specificity"[mh] OR "False Negative Reactions"[mh] OR "False Positive Reactions"[mh] OR "Reproducibility of Results"[mh] OR "Reference Values"[mh] OR "Diagnostic Errors"[mh] OR "Reference Standards"[mh] OR "Observer Variation"[mh] OR "Quality Assurance, Health Care"[mh] OR standards[sh] OR sensitiv*[tiab] OR specificit*[tiab] OR predictive value[tiab] OR accurac*[tiab] OR false positive*[tiab] OR false negative*[tiab] OR miss rate*[tiab] OR error rate*[tiab] OR detection rate*[tiab] OR diagnostic yield*[tiab] OR likelihood ratio*[tiab] OR ("odds ratio" AND diagnosis[sh]) OR "diagnostic odds ratio" [tiab] OR "diagnostic odds ratios" [tiab])) AND (((("Colorectal Neoplasms"[mh] OR "Colonic Neoplasms"[mh] OR "Sigmoid Neoplasms"[mh] OR "Rectal Neoplasms"[mh] OR</p> |

Supplemental materials for “Accuracy of the Quantitative Fecal Immunochemical Test...”

|  |                                                                                                                                                                                                                                                                                                                                                                                                                                                                                                                                                                                                                                                                                                                                                                                 |
|--|---------------------------------------------------------------------------------------------------------------------------------------------------------------------------------------------------------------------------------------------------------------------------------------------------------------------------------------------------------------------------------------------------------------------------------------------------------------------------------------------------------------------------------------------------------------------------------------------------------------------------------------------------------------------------------------------------------------------------------------------------------------------------------|
|  | “Intestinal Polyps”[mh] OR “Colonic Polyps”[mh] OR “colon cancer”[all fields] OR “colonic cancer”[all fields] OR “colorectal cancer”[all fields] OR “colon neoplasm”[all fields] OR “colonic neoplasm”[all fields] OR “colorectal neoplasm”[all fields] OR adenoma*[all fields] OR “colon polyp”[all fields] OR “colonic polyp”[all fields] OR “colorectal polyp”[all fields] OR “colon cancers”[all fields] OR “colonic cancers”[all fields] OR “colorectal cancers”[all fields] OR “colon neoplasms”[all fields] OR “colonic neoplasms”[all fields] OR “colorectal neoplasms”[all fields] OR “colon polyps”[all fields] OR “colonic polyps”[all fields] OR “colorectal polyps”[all fields])) Filters: Publication date from 2012/01/01 to 2018/05/30 Sort by: PublicationDate |
|--|---------------------------------------------------------------------------------------------------------------------------------------------------------------------------------------------------------------------------------------------------------------------------------------------------------------------------------------------------------------------------------------------------------------------------------------------------------------------------------------------------------------------------------------------------------------------------------------------------------------------------------------------------------------------------------------------------------------------------------------------------------------------------------|

Journal Pre-proof

Table 2: Studies identified by systematic review as eligible that were subsequently included or excluded for systematic review. Exclusions to avoid overlap of study populations

| Author      | Year | Journal           | Country   | Included? |
|-------------|------|-------------------|-----------|-----------|
| Symonds     | 2015 | Clin Gastro Hep   | Australia | No        |
| Symonds     | 2015 | Unit Eur Gastro J | Australia | Yes       |
| Wong        | 2012 | Int J Colo Dis    | Canada    | Yes       |
| Huang       | 2016 | Eur J Cancer      | China     | No        |
| Launoy      | 2005 | Int J Cancer      | France    | Yes       |
| Graser      | 2008 | Gut               | Germany   | Yes       |
| Brenner     | 2010 | Am J Gastro       | Germany   | No        |
| Brenner     | 2013 | Eur J Cancer      | Germany   | Yes       |
| Brenner, H  | 2013 | Eur J Cancer      | Germany   | No        |
| Tao         | 2013 | Aocologica        | Germany   | No        |
| Chen, H     | 2016 | Clin Gastro Hep   | Germany   | Yes       |
| Brenner, H  | 2017 | Int J Can         | Germany   | No        |
| Brenner     | 2017 | Clin Epid         | Germany   | No        |
| Brenner     | 2017 | Clin Trans Gastro | Germany   | No        |
| Brenner     | 2017 | Int J Cancer      | Germany   | No        |
| Brenner     | 2018 | Clin Epid         | Germany   | No        |
| Gies        | 2018 | Gastroenterology  | Germany   | Yes       |
| Levi        | 2007 | Ann Int Med       | Israel    | Yes       |
| Levi        | 2011 | Int J Cancer      | Israel    | Yes       |
| Castiglione | 2007 | Brit J Cancer     | Italy     | Yes       |
| Itoh        | 1996 | JMedSc            | Japan     | Yes       |
| Nakama      | 2001 | Eur J Cancer      | Japan     | Yes       |
| Morikawa    | 2005 | Gastroenterology  | Japan     | Yes       |
| Nakazato    | 2006 | Jap Med J         | Japan     | Yes       |
| Sohn        | 2005 | Can Res Treat     | Korea     | Yes       |
| Park        | 2010 | Am J Gastro       | Korea     | Yes       |
| Shin        | 2013 | PLoS One          | Korea     | Yes       |
| Lee         | 2015 | Clin Chem Lab M   | Korea     | Yes       |

Supplemental materials for “Accuracy of the Quantitative Fecal Immunochemical Test...”

|                    |      |                   |             |     |
|--------------------|------|-------------------|-------------|-----|
| Kim, N             | 2016 | Dig Dis Sci       | Korea       | Yes |
| Jung               | 2017 | J Gastro Hepat    | Korea       | No  |
| Kim, N             | 2017 | Dig Liver Dis     | Korea       | Yes |
| De<br>Wijkerslooth | 2012 | Am J Gastro       | Netherlands | Yes |
| Stegeman           | 2013 | Int J Cancer      | Netherlands | No  |
| Stegeman           | 2015 | Cancer Epi        | Netherlands | Yes |
| Vleugels           | 2015 | Gastroenterology  | Netherlands | No  |
| Ijspeert           | 2016 | Gastroenterology  | Netherlands | No  |
| Grobbee            | 2017 | Unit Eur Gastro J | Netherlands | No  |
| Haug               | 2017 | Gut               | Netherlands | Yes |
| VanderVlugt        | 2017 | Gastroenterology  | Netherlands | Yes |
| Hernandez          | 2012 | Gastroenterology  | Spain       | No  |
| Cubiella           | 2013 | Unit Eur Gastro J | Spain       | No  |
| Castro             | 2014 | Dig Dis Sci       | Spain       | No  |
| Cubiella           | 2014 | Unit Eur Gastro J | Spain       | No  |
| Hernandez          | 2014 | World J Gastro    | Spain       | Yes |
| Castro             | 2015 | Dig Dis Sci       | Spain       | No  |
| Liu                | 2003 | Hepato-Gastro     | Taiwan      | Yes |
| Chen, L            | 2011 | Lancet Onc        | Taiwan      | Yes |
| Chiu               | 2013 | Clin Gastro Hep   | Taiwan      | No  |
| Chen, Y            | 2014 | Adv Dig Med       | Taiwan      | No  |
| Chen, C            | 2016 | Medicine          | Taiwan      | Yes |
| Chen               | 2018 | C Epi Bio Prev    | Taiwan      | Yes |
| Aniwan             | 2017 | Asia Pac J Canc   | Thailand    | Yes |
| Imperiale          | 2014 | NEJM              | USA         | Yes |
| Johnson            | 2014 | PLoS One          | USA         | Yes |
| Mzslawiec          | 2014 | Gastroenterology  | USA         | No  |
| Doubeni            | 2016 | JABFM             | USA         | No  |
| Jensen             | 2016 | Ann Int Med       | USA         | Yes |
| Redwood            | 2016 | Mayo Cl Proc      | USA         | Yes |
| Shapiro            | 2017 | Am J Gastro       | USA         | Yes |



Supplemental materials for “Accuracy of the Quantitative Fecal Immunochemical Test...”

|       |      |             |     |     |
|-------|------|-------------|-----|-----|
| Liles | 2018 | BMC Cancer  | USA | Yes |
| Selby | 2018 | Ann Int Med | USA | Yes |

Journal Pre-proof

Table 3: Studies used to create pooled estimates of cancer and advanced adenoma prevalence, subsequently utilized to estimate prevalence from a theoretical cohort of 100,000 patients

| Author          | Year | Total screened | Total screened advanced adenomas | Positive tests | Number of cancers | Number advanced adenomas | Without cancer | Without cancer or advanced adenoma |
|-----------------|------|----------------|----------------------------------|----------------|-------------------|--------------------------|----------------|------------------------------------|
| Itoh            | 1996 | 27860          |                                  | 1490           | 89                |                          | 27771          |                                    |
| Nakama          | 2000 | 2460           |                                  | 175            | 27                |                          | 2433           |                                    |
| Liu             | 2003 | 1387           |                                  | 31             | 6                 |                          | 1381           |                                    |
| Morikawa        | 2005 | 21805          | 21805                            | 1231           | 79                | 648                      | 21726          | 21078                              |
| Sohn            | 2005 | 3794           | 3794                             | 53             | 12                | 67                       | 3782           | 3715                               |
| Nakazato        | 2006 | 3090           |                                  | 404            | 19                |                          | 3071           |                                    |
| Levi            | 2007 | 80             | 80                               | 15             | 3                 | 15                       | 77             | 62                                 |
| Graser          | 2009 | 285            | 285                              | 45             | 1                 | 24                       | 284            | 260                                |
| Park            | 2010 | 770            | 770                              | 86             | 13                | 59                       | 757            | 698                                |
| Wong            | 2012 | 1075           | 1075                             | 94             | 2                 | 67                       | 1073           | 1006                               |
| De Wijkerslooth | 2012 | 1256           | 1256                             | 71             | 8                 | 113                      | 1248           | 1135                               |
| Brenner         | 2013 | 2235           | 2235                             | 110            | 15                | 207                      | 2220           | 2013                               |
| Hernandez       | 2014 | 779            | 779                              | 55             | 5                 | 92                       | 774            | 682                                |
| Johnson         | 2014 | 193            | 193                              | 6              | 2                 | 25                       | 191            | 166                                |
| Imperiale       | 2014 | 9989           | 9989                             | 695            | 65                | 757                      | 9924           | 9167                               |
| Lee             | 2015 | 1397           | 1397                             | 72             | 14                | 7                        | 1383           | 1376                               |
| Chen            | 2016 | 3466           | 3466                             | 370            | 29                | 354                      | 3437           | 3083                               |
| Shapiro         | 2017 | 947            | 947                              | 28             | 2                 | 53                       | 945            | 892                                |
| Aniwan          | 2017 | 1479           | 1479                             | 108            | 14                | 123                      | 1465           | 1342                               |
| Kim             | 2017 | 26316          | 26316                            | 805            | 16                | 154                      | 26300          | 26146                              |
| Liles           | 2018 | 2761           | 2761                             | 116            | 2                 | 209                      | 2759           | 2550                               |
|                 |      | 85564          | 78627                            | 4570           | 334               | 2974                     | 85230          | 75371                              |
|                 |      |                | CRC prev                         | 0.390%         |                   |                          |                |                                    |
|                 |      |                | AA prev                          | 3.782%         |                   |                          |                |                                    |

Figure 1: PRISMA flow chart detailing study selection

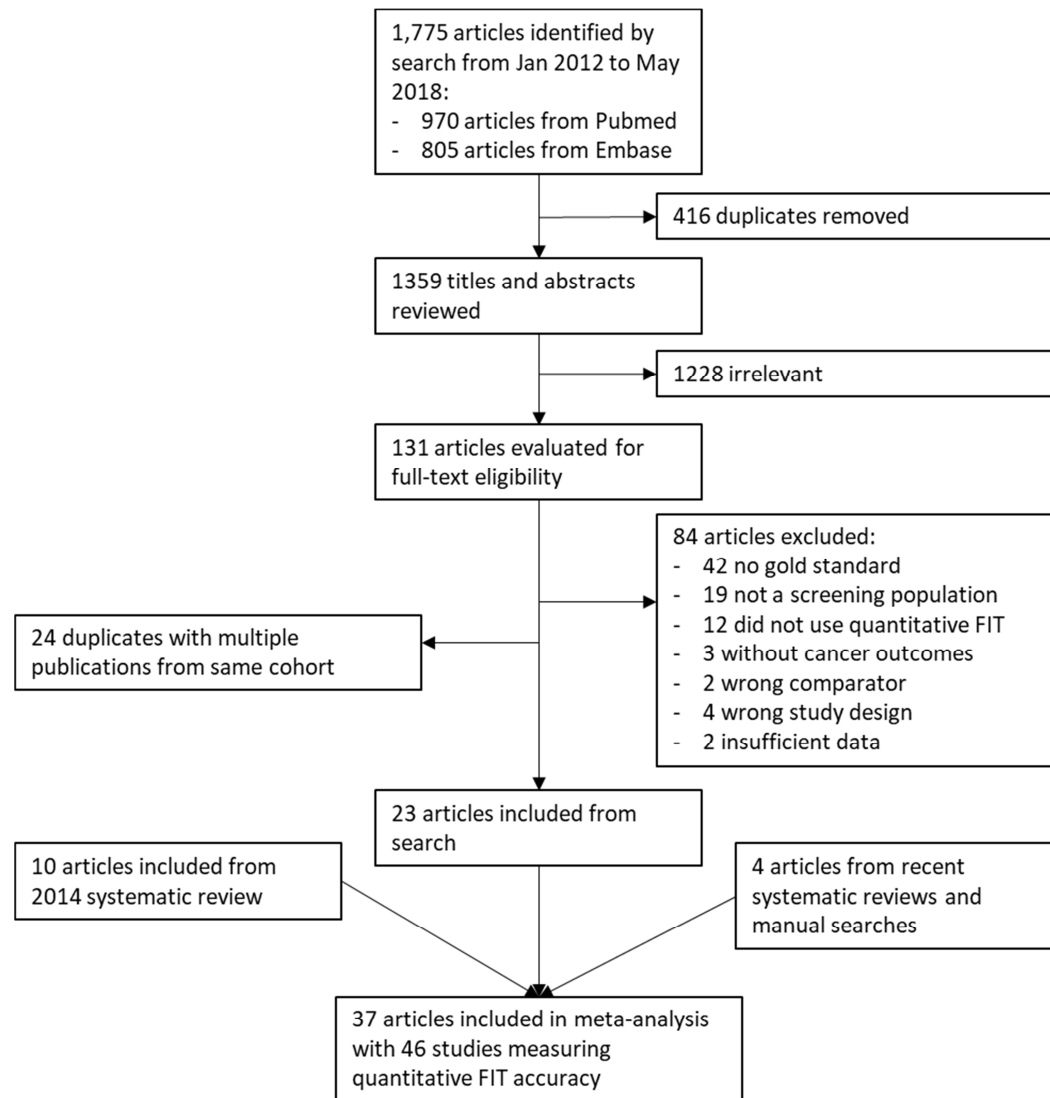

Supplemental materials for “Accuracy of the Quantitative Fecal Immunochemical Test...”

Table 4: Detailed information for included studies

| # | Author, Year (Ref) | FIT Brand and details                                       | Setting and Study Design                                                                                                                                                                                                                                            | Reference/Gold Standard                                                                                                                                                                                                                                                                                                                                                                                                                                                                            | Inclusion/Exclusion Criteria                                                                                                                                                                                                                                                                                     | Patient Characteristics                                                                                                            | Prevalence of CRC, AN, AA | FIT Positivity Rate               | CRC Sensitivity (95% CI) | CRC Specificity (95% CI)         | AA definition            | AA Sensitivity (95% CI) | CRC+AA Specificity (95% CI)                                                                                                                                                                                                                                                          | Comments and Applicability                                                                                           |
|---|--------------------|-------------------------------------------------------------|---------------------------------------------------------------------------------------------------------------------------------------------------------------------------------------------------------------------------------------------------------------------|----------------------------------------------------------------------------------------------------------------------------------------------------------------------------------------------------------------------------------------------------------------------------------------------------------------------------------------------------------------------------------------------------------------------------------------------------------------------------------------------------|------------------------------------------------------------------------------------------------------------------------------------------------------------------------------------------------------------------------------------------------------------------------------------------------------------------|------------------------------------------------------------------------------------------------------------------------------------|---------------------------|-----------------------------------|--------------------------|----------------------------------|--------------------------|-------------------------|--------------------------------------------------------------------------------------------------------------------------------------------------------------------------------------------------------------------------------------------------------------------------------------|----------------------------------------------------------------------------------------------------------------------|
| 1 | Itoh, 1996         | OC-Hemodia<br>Cut-off: 10 µg/g<br><br>1 sample              | Japan<br><br>Asymptomatic patients 40 or older who worked for corporations participating in colorectal screening program were invited during 1991-1992.<br><br>Diagnostic cohort design<br><br>Enrollment order: consecutive<br><br>Dates of recruitment: 1991-1992 | Colonoscopy for FIT-positive patients and 2-year follow-up for FIT-negative patients<br><br>FIT-negative patients were followed through health insurance claims and re-screened at 2 years. All treated cases, regardless of site for treatment, could be identified because all medical expenses are incurred by a single health insurance organization<br><br>Blinding: Endoscopists were not blinded to the FIT results<br><br>Interval between FIT and colonoscopy: Usually less than 2 months | Inclusion: Patients aged 40-59; employee of corporations that took part in CRC screening program<br><br>Exclusion: symptoms of melena, hematochezia, diarrhea, relevant changes in stool frequency or abdominal pain. Prior colonoscopy within 5 years, family history for CRC, personal history of IBD or HNPCC | N: 27,860<br><br>Mean Age: 45.2<br><br>Age range: 40-59 years old<br><br>Age <40: 0%<br><br>Age >80: 0%<br><br>Males: 86.1% (calc) | CRC<br>89/27860<br>0.3%   | 1490/27860<br>5.3%                | 77/89<br>86.5% (78-92)   | 26358/27771<br>94.9% (94.6-95.2) | Not included in analysis |                         | OC-Hemodia has been discontinued and is no longer in production.<br><br>Fairly young population as mean age is 45. Overall, population appears to be an asymptomatic, primary care population. Women are under-represented.<br><br>Funding: NR<br><br>Did not stratify by age or sex |                                                                                                                      |
| 2 | Nakama, 2001       | OC-Hemodia<br>Cut-off: 10, 30, and 60 µg/g<br><br>4 samples | Japan<br><br>Patients who participated in medical check-up for CRC between 04/90-03/99                                                                                                                                                                              | Colonoscopy for all patients                                                                                                                                                                                                                                                                                                                                                                                                                                                                       | Inclusion: Asymptomatic patients aged over 40 years who participated in a medical check-up for colorectal cancer between 04/90-03/99<br><br>Exclusion: not stated                                                                                                                                                | N = 4260<br><br>Age:<br>40-49: 27.1%<br>50-59: 35.8%<br>60-69: 21.8%<br>70+: 15.2%<br>Calculated mean: 57.2<br><br>Male: 46.5%     | 27/4260<br>0.6%           | At 150 ng/ml:<br>175/4260<br>4.1% | 22/27<br>81.5%           | 4080/4233<br>96.4%               | Adenomatous polyp > 1 cm |                         | 4059/4204<br>96.6%                                                                                                                                                                                                                                                                   | Including participants with a family history of CRC<br><br>Funding: government<br><br>Did not stratify by age or sex |
| 3 | Liu, 2003          | OC-Hemodia                                                  | Taiwan                                                                                                                                                                                                                                                              | Colonoscopy on all                                                                                                                                                                                                                                                                                                                                                                                                                                                                                 | Exclusion: Patients                                                                                                                                                                                                                                                                                              | N = 1387                                                                                                                           | CRC 6/1387                | 31/1387                           | 3/6 50%                  | 1353/1381                        | Polyp > 1 cm             | 6/37                    | 1322/1344                                                                                                                                                                                                                                                                            | Exact number of                                                                                                      |

Supplemental materials for “Accuracy of the Quantitative Fecal Immunochemical Test...”

|   |                |                                                                                                                          |                                                                                                                                                                                                                                                                                              |                                                                                                                                                                                                                                                                                                                                                                                        |                                                                                                                                                                                                                                                                                                                                                                                                                                                                                                                                            |                                                  |                    |                        |                                  |                                                                                                                                                                  |                |                      |                                                                                                                                                                                                                                                                                                                                         |
|---|----------------|--------------------------------------------------------------------------------------------------------------------------|----------------------------------------------------------------------------------------------------------------------------------------------------------------------------------------------------------------------------------------------------------------------------------------------|----------------------------------------------------------------------------------------------------------------------------------------------------------------------------------------------------------------------------------------------------------------------------------------------------------------------------------------------------------------------------------------|--------------------------------------------------------------------------------------------------------------------------------------------------------------------------------------------------------------------------------------------------------------------------------------------------------------------------------------------------------------------------------------------------------------------------------------------------------------------------------------------------------------------------------------------|--------------------------------------------------|--------------------|------------------------|----------------------------------|------------------------------------------------------------------------------------------------------------------------------------------------------------------|----------------|----------------------|-----------------------------------------------------------------------------------------------------------------------------------------------------------------------------------------------------------------------------------------------------------------------------------------------------------------------------------------|
|   |                | Cut-off: presumably 20 µg/g<br><br>Number of samples and cut-off not specified, only “per manufacturer’s instructions”   | One center<br><br>Patients participated in medical check-up and agreed to get both colonoscopy and upper endoscopy<br><br>Dates of recruitment: 12/97-11/99                                                                                                                                  | patients<br><br>undergoing only unidirectional endoscopy [only colonoscopy]; gross gastrointestinal bleeding, anal-rectal bleeding or gross blood on digital examination, previous history of a known gastrointestinal bleeding lesion, gastrointestinal cancer, previous gastrointestinal surgery, inflammatory bowel disease, and premenopausal females with iron deficiency anemia. | Mean age: 46.2 +/- 12.1 years<br><br>Male: 47%                                                                                                                                                                                                                                                                                                                                                                                                                                                                                             | 0.43%<br><br>AA 37/1387<br>2.7%                  | 2.2%               |                        | 98.0%                            |                                                                                                                                                                  | 16.2%          | 98.4%                | patients <40 unclear. Few details about performance of OC-Hemodia (i.e. blinding, etc.).<br><br>Funding: NR<br><br>Did not stratify by age or sex.                                                                                                                                                                                      |
| 4 | Morikawa, 2005 | Magstream 1000/Hem Sp<br>Cut-off: 67 µg/g<br><br>Quantitative FIT (magnetic particle agglutination)<br><br>1-sample, FIT | Japan<br><br>22,666 asymptomatic pts were consecutively enrolled to perform 1 sample FIT and colonoscopy at Kameda General Hospital or Kameda Makuhari Clinic between 1983-20002.<br><br>Diagnostic cohort study<br><br>Enrollment order: consecutive<br><br>Dates of recruitment: 1983-2002 | Colonoscopy for all patients regardless of FIT results.<br><br>Blinding: Endoscopists were blinded to the FIT results<br><br>Interval between FIT and colonoscopy: less than 2 weeks, participants brought the collection tubes on the day of colonoscopy and the stool samples were sent to the lab within 24 hours and tested immediately                                            | Inclusion: Asymptomatic patients that voluntarily agreed to FIT and colonoscopy for CRC screening<br><br>Exclusion: Patients who reported symptoms of disease of the lower GI tract including visible rectal bleeding, recent change in bowel habits, or lower abdominal pain that normally would require a medical evaluation. Pts lacking sufficient info on the polypoid lesion were also excluded.<br><br>After exclusion: N = 21,805<br><br>Mean age: 48.2 +/- 9.3 years<br><br>Age <40: 18.8%<br><br>Age >80: 0.07%<br><br>Male: 72% | CRC 79/21805<br>0.4%<br><br>AA 648/21805<br>3.0% | 1231/21805<br>5.6% | 52/79<br>65.8% (55-76) | 20547/21726<br>94.6% (94.3-94.9) | Advanced colonic neoplasia was defined as adenomas 10 mm or more in diameter, adenomas with high-grade dysplasia, or invasive cancer.<br>Therefore AA = AN – CRC | 145/648<br>22% | 20044/21078<br>95.1% | Magstream HemSp is not FDA approved and is not available in the US. However, it is available in Australia and several other countries.<br><br>Fairly young population as 19% is <40 years of age.. Overall, population appears to be an asymptomatic, primary care population.<br><br>Funding: NR<br><br>Did not stratify by age or sex |
| 5 | Launoy, 2005   | Magstream 1000/HemSp<br>Cut-off: 67 µg/g<br><br>2 samples with >= 1 above 67 µg/g                                        | France<br><br>Patients aged 50-74 yrs attending a regular consultation                                                                                                                                                                                                                       | Colonoscopy for FIT-positive patients and 2-year follow-up for FIT-negative patients.<br><br>Exclusion:                                                                                                                                                                                                                                                                                | Inclusion: Patients aged 50-74 years old who were seeing their primary care physician<br><br>Exclusion:<br><br>N: 7421<br><br>Mean age: 61.3 +/- 0.8 years<br><br>Age range: 50-                                                                                                                                                                                                                                                                                                                                                           | CRC 28/7421<br>0.38%                             | 434/7421<br>5.8%   | 24/28<br>85.7% (69-94) | 6983/7395<br>94.5% (93.9-95.0)   | Not included in analysis                                                                                                                                         |                |                      | Magstream HemSp is not FDA approved and is not available in the US. However, it is available in                                                                                                                                                                                                                                         |

Supplemental materials for “Accuracy of the Quantitative Fecal Immunochemical Test...”

|   |                |                                                                                                                                                                                       |                                                                                                                                                                |                                                                                                                                                                                                                                                                                              |                                                                                                                                                                                                                                                                                                                                                                                                                                                               |                                                                                                                                  |                                     |                |                     |                             |                                                                                                                                             |                   |                          |                                                                                                                                                                                                                                                                                                                                            |
|---|----------------|---------------------------------------------------------------------------------------------------------------------------------------------------------------------------------------|----------------------------------------------------------------------------------------------------------------------------------------------------------------|----------------------------------------------------------------------------------------------------------------------------------------------------------------------------------------------------------------------------------------------------------------------------------------------|---------------------------------------------------------------------------------------------------------------------------------------------------------------------------------------------------------------------------------------------------------------------------------------------------------------------------------------------------------------------------------------------------------------------------------------------------------------|----------------------------------------------------------------------------------------------------------------------------------|-------------------------------------|----------------|---------------------|-----------------------------|---------------------------------------------------------------------------------------------------------------------------------------------|-------------------|--------------------------|--------------------------------------------------------------------------------------------------------------------------------------------------------------------------------------------------------------------------------------------------------------------------------------------------------------------------------------------|
|   |                | considered positive                                                                                                                                                                   | with their physician were invited to participate.<br><br>Diagnostic cohort design<br><br>Enrollment order: consecutive<br><br>Dates of recruitment: 1/01-12/02 | FIT-negative patients were followed through a cancer registry.<br><br>Only followed up 5597/6987 (80.1%) for 2 years, so not a complete 2-year cancer registry follow-up.<br><br>Blinding: Endoscopists were not blinded to the FIT results.<br><br>Interval between FIT and colonoscopy: NR | symptomatic patients and patients who were not average-risk                                                                                                                                                                                                                                                                                                                                                                                                   | 74 years old<br><br>Age:<br>50-54 20.9%<br>55-59 20.3%<br>60-64 19.8%<br>65-69 22.1%<br>70-74 26.8%<br><br>Males: 43%            |                                     |                |                     |                             |                                                                                                                                             |                   |                          | Australia and several other countries.<br><br>Overall, population appears to be an asymptomatic, average-risk primary care population.<br><br>Funding: Caisse Nationale d'Assurance Maladie; Direction generale de la Sante; and Ligue contre le Cancer. FIT kits were supplied by the manufacturer<br><br>Did not stratify by age or sex. |
| 6 | Sohn, 2005     | OC-Hemodia<br>Cut-off: 20 µg/g<br><br>Quantitative FIT (optical latex agglutination technique)<br><br>1-sample FIT<br><br>No diet or medication restriction<br><br>Sample method: wet | Korea<br><br>3794 asymptomatic average risk screenees, and 304 CRC pts admitted to the National Cancer Center, Korea were studied prospectively                | Colonoscopy for all patients regardless of FIT results<br><br>Blinding: NR                                                                                                                                                                                                                   | Inclusion: Asymptomatic, average risk screenees, and 304 CRC pts admitted to the National Cancer Center, Korea from 5/01-11/02 were studied prospectively<br><br>Exclusion: Subjects with a previous colorectal pathology such as CRC, or polyps, and who had a family history of FAP, HNPCC. Subjects with recent colorectal symptoms such as abdominal pain, diarrhea, constipation, and hematochezia. Also excluded failed colonoscopic exam or poor prep. | N = 3794 (screenee group)<br>Mean age: 48.9<br>Age range 15-78 years old<br><br>Age <40: 18.2%<br>Age >80: 0%<br><br>Male: 56.7% | CRC 12/3794 0.3%<br>AA 67/3794 1.8% | 1.4%           | 3/12 25% (8.9-53.2) | 3732/3782 98.7% (98.3-99.0) | High-risk adenomas were defined as adenomas with high grade dysplasia, a 10 mm or greater diameter or with at least 25% villous components. | 4/67<br>6% (2-15) | 3678/3727<br>99% (98-99) | OC-Hemodia has been discontinued and is no longer in production.<br><br>Fairly young population as 18% is <40 years of age. Overall, population appears to be an asymptomatic, primary care population.<br><br>Funding: NR<br><br>Not stratified by age or sex                                                                             |
| 7 | Nakazato, 2006 | OC-Hemodia<br>Cut-off: 16 µg/g                                                                                                                                                        | Japan                                                                                                                                                          | Colonoscopy for all patients                                                                                                                                                                                                                                                                 | Inclusion: Asymptomatic adults                                                                                                                                                                                                                                                                                                                                                                                                                                | N = 3090                                                                                                                         | CRC 19/3,090 0.6%                   | 404/3090 13.1% | 10/19 52.6%         | 2677/3071 87.2% (86.0-      | Large adenoma > 10                                                                                                                          | 13/53 25% (13-    | 2637/3018 87%            | OC-Hemodia has been                                                                                                                                                                                                                                                                                                                        |

Supplemental materials for “Accuracy of the Quantitative Fecal Immunochemical Test...”

|   |            |                                                                                                                                                              |                                                                                                                                                                                                                                                                                                                                                                                                           |                                                                                                                                                                                                                                |                                                                                                                                                                                                              |                                                                                                                                                                              |                                     |             |                   |                   |                                                       |            |             |                                                                                                                                                                                                                                                                                                                                                                                                                                                                                      |
|---|------------|--------------------------------------------------------------------------------------------------------------------------------------------------------------|-----------------------------------------------------------------------------------------------------------------------------------------------------------------------------------------------------------------------------------------------------------------------------------------------------------------------------------------------------------------------------------------------------------|--------------------------------------------------------------------------------------------------------------------------------------------------------------------------------------------------------------------------------|--------------------------------------------------------------------------------------------------------------------------------------------------------------------------------------------------------------|------------------------------------------------------------------------------------------------------------------------------------------------------------------------------|-------------------------------------|-------------|-------------------|-------------------|-------------------------------------------------------|------------|-------------|--------------------------------------------------------------------------------------------------------------------------------------------------------------------------------------------------------------------------------------------------------------------------------------------------------------------------------------------------------------------------------------------------------------------------------------------------------------------------------------|
|   |            | Two sample with >1 of 2 samples with 16 µg/g considered a positive test                                                                                      | Cross-sectional analysis of asymptomatic adults who underwent a colonoscopy and a FIT in a single day<br><br>Diagnostic cohort design<br><br>Enrollment order: consecutive<br><br>Dates of recruitment: 7/98-7/02                                                                                                                                                                                         | regardless of FIT results<br><br>Blinding: Endoscopists were blinded to the FIT results<br><br>Interval between FIT and colonoscopy: Less than 1 month, but majority within 1 week                                             | willing to undergo both a colonoscopy and FIT<br><br>Exclusion: Personal history of CRC and colonoscopic treatment of colorectal neoplasm, history of altered bowel habits, rectal bleeding, IBD, FAP, HNPCC | Mean age: 53.4 +/- 8.2 years<br><br>Age range: 25-81 years old<br><br>Age <40: 3.0%<br><br>Age >80: 0.06%<br><br>Male: 85%                                                   | AA 53/3,090 1.7%                    |             | (30.1-75.1)       | 88.4)             | mm                                                    | 36)        |             | discontinued and is no longer in production.<br><br>Fairly young population as 3% is <40 years of age. Overall, population appears to be an asymptomatic, primary care population.<br><br>Funding: NR<br><br>Did not stratify by age or sex                                                                                                                                                                                                                                          |
| 8 | Levi, 2007 | OC-Micro<br>Cut-off: 15 µg/g<br><br>3 samples<br><br>>= 1 of 3 samples with >= 15 µg/g considered a positive result<br><br>3 day collection, no restrictions | Israel<br><br>1000 consecutive ambulatory patients, some asymptomatic but at increased risk for CRC and some symptomatic. We only analyzed a subset of 80 asymptomatic patients with a family history of CRC.<br><br>Asymptomatic, above average-risk due to family history of CRC.<br><br>Prospective, cross-sectional study design<br><br>Enrollment order: consecutive<br><br>Dates of recruitment: NR | Colonoscopy for all patients regardless of FIT results.<br><br>Blinding: Endoscopists were blinded to the FIT results<br><br>Interval between FIT and colonoscopy: FIT samples were prepared one week prior to the colonoscopy | Inclusion: Referred for colonoscopy<br><br>Exclusion: Concurrent hospitalization; visible rectal bleeding; IBD; hematuria; menstruation at time of stool specimen; inability to prepare FIT                  | N: 1000<br>Analyzing subset with family history (N = 80)<br><br>Age: NR for subgroup<br><br>Age range: NR<br><br>Age <40: NR<br><br>Age >80: NR<br><br>Male: NR for subgroup | CRC 3/80 3.8%<br><br>AA 15/80 18.8% | 15/80 18.8% | 2/3 66.7% (21-94) | 64/77 83% (73-90) | >= 10 mm, villous histology, any high-grade dysplasia | 8/15 53.3% | 57/62 91.9% | OC-Micro is FDA approved and available in the US. It has been replaced by OC-Sensor.<br><br>In addition, age was not reported in this subgroup and 100% of sample had a family history of CRC. Overall, population appears to be asymptomatic with slightly above average-risk primary care population.<br><br>Funding: Eiken Chemical provided the instruments, reagents, and partial financial support for administration. Foundation grant.<br><br>Did not stratify by age or sex |

Supplemental materials for “Accuracy of the Quantitative Fecal Immunochemical Test...”

|    |                   |                                                                                                                                                        |                                                                                                                                                                                     |                                                                                              |                                                                                                                                                                                                                                                                                                                                                                                                                                                                                                                                                                                             |                                                                                                                                         |                                                                       |                 |                          |                       |                                                   |                     |                           |                                                                                                                                                            |
|----|-------------------|--------------------------------------------------------------------------------------------------------------------------------------------------------|-------------------------------------------------------------------------------------------------------------------------------------------------------------------------------------|----------------------------------------------------------------------------------------------|---------------------------------------------------------------------------------------------------------------------------------------------------------------------------------------------------------------------------------------------------------------------------------------------------------------------------------------------------------------------------------------------------------------------------------------------------------------------------------------------------------------------------------------------------------------------------------------------|-----------------------------------------------------------------------------------------------------------------------------------------|-----------------------------------------------------------------------|-----------------|--------------------------|-----------------------|---------------------------------------------------|---------------------|---------------------------|------------------------------------------------------------------------------------------------------------------------------------------------------------|
| 9  | Castiglione, 2007 | OC-Hemodia, developed with the OC-Sensor instrument<br>Cut-off: 20 µg/g<br><br>1 sample                                                                | Italy<br><br>Regional screening program<br><br>19 municipalities in the Province of Florence<br><br>Dates of recruitment: 01/00-12/02<br><br>Follow-up with Tuscany Cancer Registry | Cancer registry follow-up to 2 years                                                         | Subjects aged 50-70, living in 19 municipalities in the Province of Florence, and attending FOBT screening from 01/00-12/02 were eligible for the present study.                                                                                                                                                                                                                                                                                                                                                                                                                            | N = 27503 tests (24913 individuals)<br><br>Calculated mean: 58.1<br>Age 50-59: 50%<br>Age 60-69: 47%<br>Age 70: 3.3%<br><br>Male: 47.8% | CRC 83/27503 0.3%<br><br>AA 219/27503 0.8%                            | 1097/27503 4.0% | 67/83 80.7%              | 26390/27420 96.2%     | Not included in analysis                          |                     |                           | Discrepancy between number of tests and number of individuals. Sens/spec based on number of tests<br><br>Funding: NR<br><br>Did not stratify by age or sex |
| 10 | Graser, 2009      | FOB Gold assay<br>Cut-off: 14 ng/ml, 2.38 µg/g<br><br>Two 10ml stool sample containers<br><br>FIT was performed in each of the two samples per patient | Germany<br><br>Prospective colorectal cancer screening cohort study of average risk adults                                                                                          | Colonoscopy for all participants, augmented by Segmental unblinding (enhanced gold standard) | Inclusion: Participants had to be 50 years of age and free of symptoms of colonic diseases such as melanic stools, hematochezia, diarrhea, relevant changes in stool frequency or abdominal pain<br><br>Exclusion: Prior OC within the last 5 years, and positive family history for CRC (one first-degree relative diagnosed with CRC before age 60 or two first-degree relatives diagnosed with CRC at any age). Persons with a history of or present IBD, hereditary colorectal cancer syndromes, a body weight 150 kg or severe cardiovascular or pulmonary disease were also excluded. | N = 285 (for FIT)<br><br>Age range: 50-81<br><br>Mean age: 60.5 (SD 7.0)<br><br>Male: 55%                                               | In screening population:<br><br>CRC 1/285 0.35%<br><br>AA 24/285 8.4% | 45/285 15.8%    | 1/1 100%                 | 240/284 84.5%         | >= 10 mm, villous histology, high-grade dysplasia | 7/24 29.2%          | 223/260 85.5%             | CRC results in detailed table<br><br>Funding source: industry<br><br>Did not stratify by age or sex                                                        |
| 11 | Park, 2010        | OC-Micro<br>Cut-off: 10 µg/g, 15 µg/g, 20 µg/g<br><br>1-, 2-, and 3-sample FIT                                                                         | Korea<br><br>1020 consecutive asymptomatic, average risk people between                                                                                                             | Colonoscopy for all patients regardless of FIT results.<br><br>Blinding: Endoscopists were   | Inclusion: Asymptomatic, average risk, age 50-75, who were undergoing a screening colonoscopy.                                                                                                                                                                                                                                                                                                                                                                                                                                                                                              | After exclusion: N = 770<br><br>Mean age: 59.3 +/- 7.5 years                                                                            | At 20 µg/g<br><br>CRC 13/770 1.7%<br><br>AA 59/770 7.7%               | 86/770 11.2%    | 10/13, 76.9% (46.2-95.0) | 709/757 93.7% (90-94) | >= 10 mm, villous histology, high-grade dysplasia | 14/59 23.7% (14-37) | 664/698 95.1% (93.3-96.6) | OC-Micro is FDA approved and available in the US. It has been replaced by OC-Sensor.                                                                       |



Supplemental materials for “Accuracy of the Quantitative Fecal Immunochemical Test...”

|    |            |                                                                                                        |                                                                                                                                                                                                                                                                                                                                                                                                           |                                                                                                                                                                                                                                                                                                                                                 |                                                                                                                                                                                                                                                                                         |                                                                                                                                                                                                                                                                        |                                        |                |                   |                         |                                                       |                                          |                                                                                                                                                                                                                                                                                                                                                   |                                                                                                                                                                                                            |
|----|------------|--------------------------------------------------------------------------------------------------------|-----------------------------------------------------------------------------------------------------------------------------------------------------------------------------------------------------------------------------------------------------------------------------------------------------------------------------------------------------------------------------------------------------------|-------------------------------------------------------------------------------------------------------------------------------------------------------------------------------------------------------------------------------------------------------------------------------------------------------------------------------------------------|-----------------------------------------------------------------------------------------------------------------------------------------------------------------------------------------------------------------------------------------------------------------------------------------|------------------------------------------------------------------------------------------------------------------------------------------------------------------------------------------------------------------------------------------------------------------------|----------------------------------------|----------------|-------------------|-------------------------|-------------------------------------------------------|------------------------------------------|---------------------------------------------------------------------------------------------------------------------------------------------------------------------------------------------------------------------------------------------------------------------------------------------------------------------------------------------------|------------------------------------------------------------------------------------------------------------------------------------------------------------------------------------------------------------|
|    |            | >= 1 of 2 samples, or >= 1 of 3 samples with the specified threshold concentration considered positive | 50-75 years of age undergoing screening colonoscopy from 4 tertiary medical centers in South Korea were invited to the study.<br><br>Asymptomatic, average risk<br><br>Prospective cohort design<br><br>Enrollment order: consecutive<br><br>Dates of recruitment: 12/07-11/08                                                                                                                            | blinded to the FIT results<br><br>Interval between FIT and colonoscopy: Stool specimens from 3 daily or consecutive BMs were collected and applied on the FIT sampling probes during the week before colonoscopy                                                                                                                                | Exclusion: History of IBD, positive FOBT, polyps or CRC. History of colonoscopy or sigmoidoscopy within 5 years. Symptoms of lower GI issues, visible rectal bleeding, or a family history of CRC.                                                                                      | Age range: 50-75 years old<br><br>Age <40: 0%<br><br>Age >80: 0%<br><br>Males: 51.4%                                                                                                                                                                                   |                                        |                |                   |                         |                                                       |                                          |                                                                                                                                                                                                                                                                                                                                                   | Overall, population appears to be an asymptomatic, average-risk primary care population.<br><br>Funding: FIT kit, reagents, and research provided by Eiken Chemical.<br><br>Did not stratify by age or sex |
| 12 | Levi, 2011 | OC-Micro<br>Cut-off: 14 µg/g<br><br>3 samples on consecutive days                                      | Israel<br><br>Average risk persons aged 50-75 years were offered either FIT or HO-SENSA according to a randomization program based on the SES of the primary care clinic.<br><br>Patients from 9 primary care clinics of Clalit Health Services (CHS) in Tel Aviv<br><br>Randomized prospective cohort design study<br><br>All included people received an invitation letter to participate in the study. | Colonoscopy for FIT-positive patients and 2-year follow-up for FIT-negative patients.<br><br>All the participants who performed the FIT, regardless of its results, were followed through the Israel National Cancer Registry<br><br>Blinding: Endoscopists were not blinded to the FIT results<br><br>Interval between FIT and colonoscopy: NR | Inclusion: Asymptomatic people aged 50-75 who received care at the 9 primary care clinics of CHS<br><br>Exclusion: Patients who had undergone a colonoscopy or sigmoidoscopy in the last 5 years, patients who participated in gFOBT screening within 2 years, IBD history, CRC history | 4,657 were randomized to FIT arm but only 1536 FIT kits were dispensed<br><br>Of the 1536 kits dispensed, 1204 returned the FIT kits<br><br>After exclusion: N = 1204<br><br>Mean age: FIT 60.4 +/- 7.6 years<br><br>Age <40: 0%<br><br>Age >80: 0%<br><br>Male: 43.6% | CRC 6/1204 0.5%<br><br>AA 29/1204 2.4% | 153/1204 12.7% | 6/6 100% (52-100) | 1051/1198 87.7% (86-90) | >= 10 mm, villous histology, any high-grade dysplasia | Unable to calculate (no false negatives) | OC-Micro is FDA approved and available in the US. It has been replaced with OC-Sensor.<br><br>Overall, population appears to be an asymptomatic, average-risk primary care population.<br><br>Funding: Eiken Chemical provided the instruments, reagents, and partial financial support for administration.<br><br>Did not stratify by age or sex |                                                                                                                                                                                                            |

Supplemental materials for “Accuracy of the Quantitative Fecal Immunochemical Test...”

|    |                       |                                                                                                                                              |                                                                                                                                                                                                                                                                                                           |                                                                                                                                                                   |                                                                                                                                                                                                                    |                                                                                                                            |                                                                   |                              |                 |                       |                                                       |                                        |                                                                                                                                                                                                                                                                                                                                                                                                 |                                                                                                                                                                                         |
|----|-----------------------|----------------------------------------------------------------------------------------------------------------------------------------------|-----------------------------------------------------------------------------------------------------------------------------------------------------------------------------------------------------------------------------------------------------------------------------------------------------------|-------------------------------------------------------------------------------------------------------------------------------------------------------------------|--------------------------------------------------------------------------------------------------------------------------------------------------------------------------------------------------------------------|----------------------------------------------------------------------------------------------------------------------------|-------------------------------------------------------------------|------------------------------|-----------------|-----------------------|-------------------------------------------------------|----------------------------------------|-------------------------------------------------------------------------------------------------------------------------------------------------------------------------------------------------------------------------------------------------------------------------------------------------------------------------------------------------------------------------------------------------|-----------------------------------------------------------------------------------------------------------------------------------------------------------------------------------------|
|    |                       |                                                                                                                                              | Asymptomatic people willing to participate were instructed to go to the primary care clinic and ask for the FIT/FOBT kits.<br><br>Enrollment order: random<br><br>Dates of recruitment: NR                                                                                                                |                                                                                                                                                                   |                                                                                                                                                                                                                    |                                                                                                                            |                                                                   |                              |                 |                       |                                                       |                                        |                                                                                                                                                                                                                                                                                                                                                                                                 |                                                                                                                                                                                         |
| 13 | Chen, 2011            | OC-Sensor<br>Cut-off 20 µg/g<br><br>1 sample<br><br>Results for intervals (1-19, 20-39, 40-59, 60-79, 80-99, and > 100 ng/mL) also presented | Taiwan<br><br>Participants part of a community-based colorectal screening program (part of larger multiple-screening program). 56025 individuals aged 40-69 identified from population registry in Keelung, Taiwan.<br><br>Prospective cohort with staggered entry<br><br>Dates of recruitment: 2001-2007 | Colonoscopy recommended for positive tests. For those who did not do colonoscopy or had negative screen, linkage to the national cancer registry.                 | Inclusion: Unclear. Population invited to a screening program for residents aged 40-69. Number with family history of CRC not reported.                                                                            | N = 45992<br><br>Mean age (calculated): 53<br><br>40-49 44%<br>50-59 32%<br>60-69 24%<br><br>Male: 37%                     | CRC 115/46355 0.25%<br><br>Only screen detected adenomas reported | 2031/46355 4.4% (at 20 µg/g) | 70/115 60.9%    | 44279/46240 96%       | Adenomas larger than 10 mm were defined as advanced   | Only screen detected adenomas reported | Numbers extracted those for the full follow-up (median 4.39 years, IRQ 2.53-6.12), which may artificially lower the sensitivity, especially in the setting of repeat screening. Other results presented in rates. May be worth contacting the study authors to obtain number of cancers within 1 or 2 years follow-up.<br><br>Funding: No funding source<br><br>Did not stratify by age or sex. |                                                                                                                                                                                         |
| 14 | De Wijkerslooth, 2012 | OC-Micro/Sensor<br>Cut-off: 10, 15, 20 µg/g<br><br>1 sample                                                                                  | Netherlands<br><br>Asymptomatic subjects who voluntarily underwent screening colonoscopy as part of a colon cancer screening program<br><br>Enrollment                                                                                                                                                    | Colonoscopy for all patients regardless of FIT results<br><br>Blinding: Endoscopists were blinded to the FIT results<br><br>Interval between FIT and colonoscopy: | Inclusion: Asymptomatic individuals from Amsterdam and Rotterdam regions<br><br>Exclusion: Invitees who had a prior colonoscopy, CT colonography, double contrast barium enema within 5 years, personal history of | After exclusion: N = 1256<br><br>Mean age: 60<br><br>Age range: 50-75 years<br><br>Male: 51%<br><br>Family history of CRC: | CC 8/1256 0.6%<br><br>AA 113/1256 9%                              | 71/1256 5.7% (at 20 µg/g)    | 6/8 75% (36-96) | 1183/1248 95% (93-96) | >= 10 mm, villous histology, any high-grade dysplasia | 33/113 29% (21-39)                     | 1103/1137 97% (96-98)                                                                                                                                                                                                                                                                                                                                                                           | OC-Micro/Sensor is FDA approved and available in the US.<br><br>In addition, 15% of sample had a family history of CRC. Overall, population appears to be an asymptomatic, average-risk |

Supplemental materials for “Accuracy of the Quantitative Fecal Immunochemical Test...”

|    |               |                                                                                                                                                                   |                                                                                                                                               |                                                                                                                       |                                                                                                                                                                                                                                                                                                                                                                                                                                                                                                                                               |                                                                                                                             |                                                                     |                            |          |                    |                                                                               |                 |                    |                                                                                                                                                                                                                                                                                                                                                                 |
|----|---------------|-------------------------------------------------------------------------------------------------------------------------------------------------------------------|-----------------------------------------------------------------------------------------------------------------------------------------------|-----------------------------------------------------------------------------------------------------------------------|-----------------------------------------------------------------------------------------------------------------------------------------------------------------------------------------------------------------------------------------------------------------------------------------------------------------------------------------------------------------------------------------------------------------------------------------------------------------------------------------------------------------------------------------------|-----------------------------------------------------------------------------------------------------------------------------|---------------------------------------------------------------------|----------------------------|----------|--------------------|-------------------------------------------------------------------------------|-----------------|--------------------|-----------------------------------------------------------------------------------------------------------------------------------------------------------------------------------------------------------------------------------------------------------------------------------------------------------------------------------------------------------------|
|    |               |                                                                                                                                                                   | order:<br>Randomized<br><br>Prospective cohort design (part of COCOS-trial)<br><br>Dates of recruitment:<br>6/09-7/10                         | Usually less than 48 hours                                                                                            | CRC, IBD, or adenomas, and individuals with an end stage and a life expectancy of less than 5 years                                                                                                                                                                                                                                                                                                                                                                                                                                           | 193/1256<br>15.4%                                                                                                           |                                                                     |                            |          |                    |                                                                               |                 |                    | primary care population.<br><br>Funding: The Netherlands Organization for Health Research and Development and by the Center for Transitional Molecular Medicine<br><br>Did not stratify by age or sex                                                                                                                                                           |
| 15 | Wong, 2012    | MagStream HemSp/HT (tube-based wet sampling, immunochemical test)<br>Cut-off: 67 µg/g<br><br>One sample for quantitative FIT<br><br>2 samples for qualitative FIT | Canada<br><br>Regional cancer screening program<br><br>Referred for elective screening colonoscopy<br><br>Dates of recruitment:<br>4/08-10/09 | Colonoscopy on all patients                                                                                           | Inclusion:<br>Asymptomatic, 50-75 years of age, and no personal or family history of colorectal cancer or polyps. Participants at increased risk for colorectal cancer were included if they were 40-75 years of age with known personal or significant family history of colorectal cancer or polyps.<br><br>Exclusion: Under 40 or over 75 years of age, unable to understand or sign the informed consent, or had a recent history of visible hematochezia or IBD. Participants with significant medical comorbidities were also excluded. | N = 1075<br><br>Mean age:<br>56.3 years<br><br>Male: 46.25%<br><br>42% with first degree family hx of cancer, 12% of polyps | CRC 2/1075<br>0.2%<br><br>Screen relevant neoplasia 69/1075<br>6.4% | 94/1075<br>8.7% at 67 µg/g | 2/2 100% | 981/1073<br>91.4%  | >10 mm diameter, tubulovillous or villous structure, and high-grade dysplasia | 24/67<br>35.8%  | 938/1006<br>93.8%  | Results provided by private communication<br><br>Funding: Capital Health Authority, Edmonton, Alberta, Canada. Beckman Coulter Inc., USA provided Hemocult ICT collection cards and test devices. Fujirebio Inc., Japan provided the Magstream HT. Reagents and support were provided by Fujirebio Diagnostics Inc., USA.<br><br>Did not stratify by age or sex |
| 16 | Brenner, 2013 | RIDASCREEN Haemoglobin<br>Cut-off: 24.5 µg/g<br><br>Adjusted thresholds for 3 different FIT tests to match                                                        | Germany<br><br>Asymptomatic, average-risk subjects who underwent screening colonoscopy                                                        | Colonoscopy for all patients regardless of FIT results.<br><br>Blinding: Endoscopists were blinded to the FIT results | Inclusion: Average risk patients ages 50-79 years who were willing to undergo a screening colonoscopy and were willing to perform an FOBT and provide stool prior to                                                                                                                                                                                                                                                                                                                                                                          | After exclusion: N = 2235<br><br>Mean age:<br>62.7 years<br><br>Age range: 50-79 years                                      | CRC 15/2235<br>0.7%<br><br>AA 207/2235<br>9.3%                      | 112/2235<br>5%             | 9/15 60% | 2118/2220<br>95.4% | >= 10 mm, villous histology, any high-grade dysplasia                         | 43/207<br>20.8% | 1954/2013<br>97.1% | RIDASCREEN is not FDA approved and not available in the US.<br><br>Overall, population appears to be an                                                                                                                                                                                                                                                         |

Supplemental materials for “Accuracy of the Quantitative Fecal Immunochemical Test...”

|    |            |                                                                                                                                                                |                                                                                          |                                                               |                                                                                                                                                                                                                                  |                                                                                                                                                 |                                                                         |                                      |                                |                                                       |                          |                    |                                                                                                                                                                                                                                                                                                                                                                                                                                                                                                         |                                                                                                                                                                                                                                                                 |
|----|------------|----------------------------------------------------------------------------------------------------------------------------------------------------------------|------------------------------------------------------------------------------------------|---------------------------------------------------------------|----------------------------------------------------------------------------------------------------------------------------------------------------------------------------------------------------------------------------------|-------------------------------------------------------------------------------------------------------------------------------------------------|-------------------------------------------------------------------------|--------------------------------------|--------------------------------|-------------------------------------------------------|--------------------------|--------------------|---------------------------------------------------------------------------------------------------------------------------------------------------------------------------------------------------------------------------------------------------------------------------------------------------------------------------------------------------------------------------------------------------------------------------------------------------------------------------------------------------------|-----------------------------------------------------------------------------------------------------------------------------------------------------------------------------------------------------------------------------------------------------------------|
|    |            | positivity rate of gFOBT<br>Quantitative FIT<br>1-sample FIT                                                                                                   | Enrollment order:<br>Consecutive<br><br>Prospective cohort design                        | Interval between FIT and colonoscopy:<br>average about 4 days | colonoscopy.<br><br>Exclusion: visible rectal bleeding, previous +FOBT, IBD, prior colonoscopy, bad prep, stool sampling after colonoscopy, incomplete colonoscopy, pseudopolyps found on colonoscopy                            | Age <40: 0%<br><br>Age >80: 0%<br><br>Male: 49.2%                                                                                               |                                                                         |                                      |                                |                                                       |                          |                    |                                                                                                                                                                                                                                                                                                                                                                                                                                                                                                         | asymptomatic, average-risk primary care population.<br><br>Funding: German Research Foundation and by a grant from the German Federal ministry of Education and Research. R-Biopharm AG provided FIT kits without charge.<br><br>Did not stratify by age or sex |
| 17 |            | OC- Sensor<br>Cut-off: 6.1 µg/g<br><br>Adjusted thresholds for 3 different FIT tests to match positivity rate of gFOBT<br><br>Quantitative FIT<br>1-sample FIT | Dates of recruitment:<br>2005-2009                                                       |                                                               |                                                                                                                                                                                                                                  |                                                                                                                                                 | 112/2235<br>5%                                                          | 11/15<br>73.3%<br>(44.8-91.1)        | 2121/2220<br>95.5% (94.6-96.3) | >= 10 mm, villous histology, any high-grade dysplasia | 46/207<br>22.2%          | 1960/2013<br>97.4% |                                                                                                                                                                                                                                                                                                                                                                                                                                                                                                         |                                                                                                                                                                                                                                                                 |
| 18 | Shin, 2013 | OC Sensor<br>Cut-off:<br>unspecified, presumably 20 µg/g<br><br>27.2% quantitative FIT<br><br>Sample number unclear                                            | Korea<br><br>National Cancer Screening Program<br><br>Dates of recruitment:<br>2004-2007 | Cancer ascertainment by linkage to national cancer registry   | Inclusion: Medical Aid recipients and NHI beneficiaries invited to participate in the NCSP, men and women aged 50 years and older, lower 30-50% income bracket<br><br>Exclusion: 528 participants with missing screening results | N = 354014 FIT kits first round<br><br>Age range:<br>50-59 48.9%<br>60-69 38%<br>70+ 13.1<br><br>Calculated mean age:<br>61.4<br><br>Men: 43.6% | CRC<br>839/354014<br>0.24%<br><br>AAs not noted as from cancer registry | 9665/<br>354014<br>2.73% (2.68-2.77) | 434/839<br>51.7 (48.3-55.2)    | 343915/<br>353175<br>97.3% (97.3-97.4)                | Not included in analysis |                    | OC-Sensor was the most popular FIT, but not exclusive. Concern that not all quantitative FIT were OC-Sensor or at which threshold. Used results from first round of screening. Sensitivity calculated using sensitivity within 1 year (interval cancer was defined as a CRC cancer that was diagnosed outside a screening program within a year from the time of a negative screening in the NCSP).<br><br>Funding: Grant-in-Aid for Cancer Research and Control from the National Cancer Center, Korea |                                                                                                                                                                                                                                                                 |

Supplemental materials for “Accuracy of the Quantitative Fecal Immunochemical Test...”

|    |                 |                                                   |                                                                                                                                                          |                                                                                                                                                                                                                                                                                                                                                                                                                                                                                                                                                                                                                                                                                                                                                                                         |                                                                                           |                                                                                                                         |                                                        |                               |                                                                                  |                                                                                                              |                  |                    |                                                                                                                                                                                                                                                                                                                                                                                                                                                                 |                                                                                                                  |
|----|-----------------|---------------------------------------------------|----------------------------------------------------------------------------------------------------------------------------------------------------------|-----------------------------------------------------------------------------------------------------------------------------------------------------------------------------------------------------------------------------------------------------------------------------------------------------------------------------------------------------------------------------------------------------------------------------------------------------------------------------------------------------------------------------------------------------------------------------------------------------------------------------------------------------------------------------------------------------------------------------------------------------------------------------------------|-------------------------------------------------------------------------------------------|-------------------------------------------------------------------------------------------------------------------------|--------------------------------------------------------|-------------------------------|----------------------------------------------------------------------------------|--------------------------------------------------------------------------------------------------------------|------------------|--------------------|-----------------------------------------------------------------------------------------------------------------------------------------------------------------------------------------------------------------------------------------------------------------------------------------------------------------------------------------------------------------------------------------------------------------------------------------------------------------|------------------------------------------------------------------------------------------------------------------|
|    |                 |                                                   |                                                                                                                                                          |                                                                                                                                                                                                                                                                                                                                                                                                                                                                                                                                                                                                                                                                                                                                                                                         |                                                                                           |                                                                                                                         |                                                        |                               |                                                                                  |                                                                                                              |                  |                    |                                                                                                                                                                                                                                                                                                                                                                                                                                                                 | and a grant from the National R&D Program for Cancer Control, Ministry of Health and Welfare, Republic of Korea. |
| 19 | Imperiale, 2014 | OC FIT-CHEK<br>Cut-off: 20 µg/g<br><br>1 sample   | US and Canada<br><br>Cross-sectional study at 90 sites in US and Canada, private-practice and academic settings<br><br>Dates of recruitment: 06/11-11/12 | Screening colonoscopy on all participants<br><br>Inclusion: Age 50-84 scheduled for screening colonoscopy<br><br>Exclusion: personal history of colorectal neoplasia, digestive cancer, or IBD; had undergone colonoscopy within the previous 9 years or a barium enema, computed tomographic colonography, or sigmoidoscopy within the previous 5 years; had positive results on fecal blood testing within the previous 6 months; had undergone colorectal resection for any reason other than sigmoid diverticular; had overt rectal bleeding within the previous 30 days; had a personal or family history of colorectal cancer; had participated in any interventional clinical study within the previous 30 days; or were unable or unwilling to provide written informed consent | N = 9989<br><br>Mean age: 64.2 (SD 8.41)<br><br>Age range: 50-84 years<br><br>Male: 46.3% | CRC 65/9989<br>0.65%<br><br>High-grade dysplasia 39/9989<br>0.39%<br><br>Advanced precancerous lesions 757/9989<br>7.6% | 6.96% (taken from table extrapolated to 10,000 people) | 48/65<br>73.8%<br>(61.5-84.0) | 9294/9924<br>93.6%<br>(proportion with negative test among those without cancer) | High-grade dysplasia or with > 25% villous histologic features or measuring > 1 cm in the greatest dimension | 180/757<br>23.8% | 8695/9167<br>94.9% | The study author definition of specificity: “with advanced precancerous lesions on colonoscopy excluded and only non-advanced adenomas and negative results include (the primary measure of specificity) and with only negative results included (the secondary measure of specificity). Had to back-calculate specificity among those without cancer, as these numbers weren’t presented.<br><br>Funding: Exact Sciences<br><br>Did not stratify by age or sex |                                                                                                                  |
| 20 | Hernandez, 2014 | OC-Sensor<br>Cut-off: 10, 15, 20, 25, 30, 40 µg/g | Spain<br><br>Multicenter, prospective, blinded cohort                                                                                                    | Colonoscopy on all patients<br><br>Inclusion: asymptomatic men and women aged 50-69 years included in COLONPREV study                                                                                                                                                                                                                                                                                                                                                                                                                                                                                                                                                                                                                                                                   | N = 779<br><br>Mean age 57.55 +/- 4.55<br><br>Male: 50%                                   | CRC 5/779<br>0.6%<br><br>AA 92/779<br>11.7%                                                                             | FIT1 at 20 µg/g 55/779<br>7.1%                         | 5/5 100%<br>(90-100)          | 724/774 94%<br>(92-95)                                                           | High-grade dysplasia or with > 25% villous histologic                                                        | 26/92<br>28.3%   | 655/682 96%        | Funding: government<br><br>Did not stratify by age or sex                                                                                                                                                                                                                                                                                                                                                                                                       |                                                                                                                  |

Supplemental materials for “Accuracy of the Quantitative Fecal Immunochemical Test...”

|    |               |                                                            |                                                                                                                                                                                    |                             |                                                                                                                                                                                                                                                                                                                                                                                                                                                                         |                                                                                                                                     |                                           |                   |                |                    |                                                                               |                 |                  |                                                                                                                                                                                                                                                                                                                                                              |
|----|---------------|------------------------------------------------------------|------------------------------------------------------------------------------------------------------------------------------------------------------------------------------------|-----------------------------|-------------------------------------------------------------------------------------------------------------------------------------------------------------------------------------------------------------------------------------------------------------------------------------------------------------------------------------------------------------------------------------------------------------------------------------------------------------------------|-------------------------------------------------------------------------------------------------------------------------------------|-------------------------------------------|-------------------|----------------|--------------------|-------------------------------------------------------------------------------|-----------------|------------------|--------------------------------------------------------------------------------------------------------------------------------------------------------------------------------------------------------------------------------------------------------------------------------------------------------------------------------------------------------------|
|    |               | 2 samples on consecutive days. Only 1 sample results used. | study<br>3 hospitals in Spain, COLONPREV study in Galicia and Euskadi. Colonoscopy arm of a randomized trial comparing FIT and colonoscopy.<br><br>Dates of recruitment: 1/10-6-11 |                             | Exclusion: Personal history of CRC, adenoma or IBD, family history of hereditary or familial CRC (i.e. >2 first-degree relatives with CRC or one diagnosed before the age of 60 years), severe comorbidity, previous colectomy, FIT screening in the past 2 years, sigmoidoscopy or colonoscopy within the past 5 years or symptoms requiring additional workup. Individuals were also excluded if they did not accept the study or refused to undergo the colonoscopy. |                                                                                                                                     |                                           |                   |                |                    | features or measuring > 1 cm in the greatest dimension                        |                 |                  |                                                                                                                                                                                                                                                                                                                                                              |
| 21 | Johnson, 2014 | OC FIT-CHEK<br>Cut-off: 20 µg/g<br><br>1 sample            | United States<br><br>Prospective cohort evaluation<br><br>61 sites<br><br>Dates of recruitment: 3/12-11/12                                                                         | Colonoscopy on all patients | Inclusion: Undergoing screening colonoscopy<br><br>Exclusion: History of CRC or recommendation for repeat colonoscopy interval <10 years; neoadjuvant treatment; family history; IBD; acute or chronic gastritis; current cancer diagnosis other than CRC; overt bleeding or bleeding hemorrhoids; known infection with HIV, HBV, or HCV; IV fluids at time of sample collection. Patients with 'curative biopsy' at time of colonoscopy also excluded.                 | N = 193 in screening cohort<br><br>Age range<br>50-59 64%<br>60-69 25%<br>>69 11%<br><br>Calculated mean age: 59.7<br><br>Male: 38% | CRC 2/193<br>1.0%<br><br>AA 25/193<br>13% | 6/193 3.1%        | 2/2 100%       | 187/191<br>97.9%   | >10 mm diameter, tubulovillous or villous structure, and high-grade dysplasia | 1/25 0.4%       | 163/166<br>98.2% | Results provided by private communication<br><br>Funding: The study was sponsored by Epigenomics AG (Berlin, Germany). Eastern VA Medical School, Rockford Gastroenterology Associates, Ltd., Digestive Health Specialists and Molecular Pathology Laboratory Network, Inc., provided support in the form of salaries.<br><br>Did not stratify by age or sex |
| 22 | Symonds, 2015 | OC Sensor<br>Cut-off: 10 µg/g                              | Australia                                                                                                                                                                          | Colonoscopy on all patients | Inclusion: Any adults (40-85 years of age)                                                                                                                                                                                                                                                                                                                                                                                                                              | N = 1381                                                                                                                            | CRC 66/1381<br>4.8%                       | 309/1381<br>22.4% | 52/66<br>78.8% | 1058/1315<br>80.5% | Villous or serrated                                                           | 80/189<br>42.3% | 949/1126<br>84%  | Elevated number of cancers,                                                                                                                                                                                                                                                                                                                                  |

Supplemental materials for “Accuracy of the Quantitative Fecal Immunochemical Test...”

|    |                |                                                                                                                                                      |                                                                                                                                                                       |                                                                                                                                               |                                                                                                                                                                                                                                                                                                                                                                                                                                                                                                                                                                               |                                                                             |                                               |                                            |           |                    |                                                                               |     |     |                                                                                                                                                                                                                                                                                                                                                              |
|----|----------------|------------------------------------------------------------------------------------------------------------------------------------------------------|-----------------------------------------------------------------------------------------------------------------------------------------------------------------------|-----------------------------------------------------------------------------------------------------------------------------------------------|-------------------------------------------------------------------------------------------------------------------------------------------------------------------------------------------------------------------------------------------------------------------------------------------------------------------------------------------------------------------------------------------------------------------------------------------------------------------------------------------------------------------------------------------------------------------------------|-----------------------------------------------------------------------------|-----------------------------------------------|--------------------------------------------|-----------|--------------------|-------------------------------------------------------------------------------|-----|-----|--------------------------------------------------------------------------------------------------------------------------------------------------------------------------------------------------------------------------------------------------------------------------------------------------------------------------------------------------------------|
|    |                | 1 sample                                                                                                                                             | <p>Patients scheduled for colonoscopy. Part of study for screening blood test (methylated BCAT/IKZF1, Clinical Genomics)</p> <p>FIT within 2 weeks of colonoscopy</p> |                                                                                                                                               | <p>scheduled for colonoscopy for standard clinical indications were approached about volunteering. Subjects were excluded if the scheduled colonoscopy was canceled, if insufficient blood was drawn, or if FIT kits were returned to the processing lab &gt;2 weeks after sample collection.</p> <p>Exclusion: Younger age groups were not included as they are considered to be at lower risk for developing CRC.</p>                                                                                                                                                       | <p>Median age: 60.7 (42.0-79.0)</p> <p>Male: 29.4%</p>                      | AA 189/1381<br>13.7%                          |                                            |           |                    | morphology, >= 10 mm, high-grade dysplasia, or more than two tubular adenomas |     |     | <p>though appears to be a screening population. Data taken from two identical abstracts. Assumption made that “significant neoplasia” = CRC + AA.</p> <p>Funding: FIT for the studies were subsidized by Elken Chemical Co., Japan. Parts of the research were supported by a project grant from NHMRC Australia.</p> <p>Did not stratify by age or sex.</p> |
| 23 | Stegeman, 2015 | <p>OC-Sensor<br/>Cut-off: 10 µg/g</p> <p>3 rounds (this article focuses on third round, calculations focused on first round), 1 sample each time</p> | <p>Netherlands</p> <p>Dynamic cohort study</p> <p>Screening-naïve part of biennial FIT-based CRC screening program</p>                                                | <p>FIT positive received colonoscopy (if no contraindications); interval cancers were detected by link to the Netherlands Cancer Registry</p> | <p>Inclusion: Randomly selected individuals between 50 and 75 years of age, living in the same postal code areas in Amsterdam region as those invited to rounds one and two, were invited to participate in this third round of biennial FIT screening (eligible invitees).</p> <p>Exclusion: Except for those who had moved out of the area, passed the upper age limit, or had tested positive in a previous screening round; institutionalized people; the invitation letter indicated that invitees with rectal blood loss and/or a change in bowel habits should not</p> | <p>N = 2871 in first round</p> <p>Mean age 59 (SD 6.8)</p> <p>Male: 51%</p> | 1 <sup>st</sup> round CRC<br>12/2871<br>0.23% | 1 <sup>st</sup> round:<br>233/2871<br>8.1% | 15/20 75% | 2633/2851<br>92.4% | >= 10 mm, villous adenoma, high-grade dysplasia                               | N/A | N/A | <p>2-year registry between FIT used for those with a negative FIT</p> <p>Funding: Government and industry</p>                                                                                                                                                                                                                                                |

Supplemental materials for “Accuracy of the Quantitative Fecal Immunochemical Test...”

|    |              |                                                                                                          |                                                                                                                                                                                                                 |                                                                             |                                                                                                                                                                                                                                                                                                                                                                                                                                                                                                                                                                                                                     |                                                                   |                        |                  |                           |                            |                                                                                             |           |                 |                                                                                                                                                                                                                                                            |
|----|--------------|----------------------------------------------------------------------------------------------------------|-----------------------------------------------------------------------------------------------------------------------------------------------------------------------------------------------------------------|-----------------------------------------------------------------------------|---------------------------------------------------------------------------------------------------------------------------------------------------------------------------------------------------------------------------------------------------------------------------------------------------------------------------------------------------------------------------------------------------------------------------------------------------------------------------------------------------------------------------------------------------------------------------------------------------------------------|-------------------------------------------------------------------|------------------------|------------------|---------------------------|----------------------------|---------------------------------------------------------------------------------------------|-----------|-----------------|------------------------------------------------------------------------------------------------------------------------------------------------------------------------------------------------------------------------------------------------------------|
|    |              |                                                                                                          |                                                                                                                                                                                                                 |                                                                             | participate in screening, but contact their general practitioner instead.                                                                                                                                                                                                                                                                                                                                                                                                                                                                                                                                           |                                                                   |                        |                  |                           |                            |                                                                                             |           |                 |                                                                                                                                                                                                                                                            |
| 24 | Lee, 2015    | Hemo Tech NS-Plus C system<br>Cut off: 6.3, 19 µg/g<br><br>1 sample                                      | Korea<br><br>1397 individuals who received annual physical check-up at the Gangnam branch of Korean Association of Health Promotion (KAHP)<br><br>Dates of recruitment: 07/12-03/13                             | Colonoscopy on all patients                                                 | Inclusion: Individuals aged 50-76 years who received annual physical check-up at Gangnam branch of KAHP<br><br>Exclusion: Personal history of CRC                                                                                                                                                                                                                                                                                                                                                                                                                                                                   | N = 1397<br><br>Median age: 58 years<br><br>Male: 47%             | At 19 µg/g: 14/1397 1% | 72/1397 5.1%     | 10/14 71.4%               | 1321/1383 95.5%            | High-risk adenoma >3 or >1 cm diameter or villous in nature or showing high-grade dysplasia | 3/7 42.9% | 1325/1376 96.3% | Letter to the editor<br><br>Funding source: NR<br><br>Did not stratify by age or sex                                                                                                                                                                       |
| 25 | Jensen, 2015 | OC-FIT CHEK samples analyzed with OC SENSOR DIANA automatic analyzer<br>Cut-off: 20 µg/g<br><br>1 sample | United States<br><br>Retrospective longitudinal study<br><br>2 integrated health systems, first round mailing in 2007 or 2008 to ages 50-70, 1 year follow-up. Extraction of 1 <sup>st</sup> round of screening | Cancer within 1 year from cancer registry. 7% of positives did colonoscopy. | Inclusion: Participants aged 50-70 years on the date an initial kit was mailed to them in 2007 or 2008<br><br>Exclusion: Patients were excluded if they had been enrolled in the health plan for less than 1 year before the round 1 FIT mail date (to allow for the recording of prior out-of-system endoscopy procedures). They were also excluded if they were mailed a kit but subsequently had sigmoidoscopy or colonoscopy, were diagnosed with CRC, died or terminated membership in the health plan before returning the initial FIT or within 1 year after their round 1 mail date if no FIT was returned. | N = 323349<br><br>Mean age: 58.5 years (SD 5.7)<br><br>Men: 46.4% | CRC 645/323349 0.2%    | 16037/323349 5%  | 545/645 84.5%             | 307202/322704 95.2%        |                                                                                             |           |                 | Used results first round of screening, with one year of follow-up in registry. Reported sensitivity to two years was programmatic results, unable to calculate corresponding specificity.<br><br>Funding: government<br><br>Did not stratify by age or sex |
| 26 | Chen, 2016   | OC-Sensor<br>Cut-off: 20 µg/g                                                                            | Taiwan<br><br>Standard                                                                                                                                                                                          | National cancer registry and National Death                                 | Restricted to those 50 years and older for this extraction.                                                                                                                                                                                                                                                                                                                                                                                                                                                                                                                                                         | N = 513283 total                                                  | CRC 763/141045 0.54%   | 8583/141045 6.1% | 712/763 93.3% (91.5-95.1) | 132411/140282 94.4% (94.3- | Not included in analysis                                                                    |           |                 | Extraction restricted to those 50+.                                                                                                                                                                                                                        |



Supplemental materials for “Accuracy of the Quantitative Fecal Immunochemical Test...”

|    |               |                                                                                                         |                                                                                                                                                                                |                                 |                                                                                                                                                                                                                                                                   |                                                                                                                                             |                                          |                |                         |                             |                                                                                                          |                           |                             |                                                                                                                                                                                                          |
|----|---------------|---------------------------------------------------------------------------------------------------------|--------------------------------------------------------------------------------------------------------------------------------------------------------------------------------|---------------------------------|-------------------------------------------------------------------------------------------------------------------------------------------------------------------------------------------------------------------------------------------------------------------|---------------------------------------------------------------------------------------------------------------------------------------------|------------------------------------------|----------------|-------------------------|-----------------------------|----------------------------------------------------------------------------------------------------------|---------------------------|-----------------------------|----------------------------------------------------------------------------------------------------------------------------------------------------------------------------------------------------------|
|    |               | 1 sample                                                                                                | medical screening program between 1994 and end of 2007                                                                                                                         | File                            | Otherwise not noted.                                                                                                                                                                                                                                              | Age 50+: 28%<br>Extraction restricted to those 50+, which included age: 50-59: 53% 60+: 47%<br><br>Calculated mean age: 60<br><br>Male: 46% | AAs not noted as from cancer registry    |                |                         | 94.5)                       |                                                                                                          |                           |                             | Inconsistencies in numbers between Table 1 and Table 2, possibly because of 1 year vs. longer follow-up<br><br>Funding: government<br><br>Stratified by age and sex (ages 20-49)                         |
| 27 | Kim, 2016     | OC-Sensor DIANA<br>Cut-off: 10, 15, 20 µg/g (20 is principal cut-off)<br><br>1 sample FIT test          | Korea<br><br>National Cancer Screening Program at Kangbuk Samsung Hospital<br><br>Dates of recruitment: 6/13-5/15                                                              | Colonoscopy on all participants | Inclusion: All subjects participating in the NCSF who got colonoscopy, including 770/1532 with positive results and 3489/33015 with negative results.<br><br>Exclusion: Previous history of CRC or colorectal surgery, IBD, incomplete colonoscopy, under age 50. | N = 3990, after exclusions<br><br>Mean age: 64.3<br><br>Male: 54.2%                                                                         | CRC 79/3990 2%<br><br>AA 376/3990 9.4%   | 770/3990 19%   | 58/79 73.4% (62.3-82.7) | 3230/3911 82.6% (81.4-83.8) | Adenoma >10 mm in diameter, with tubulovillous or villous structure, or with high-grade dysplasia (HGD). | 145/386 38.6% (33.6-43.7) | 3006/3566 84.3% (83.1-85.5) | Positive FIT over-represented in this study as those with positive FIT are more likely to get colonoscopy, unclear direction of bias with that.<br><br>Funding: NR<br><br>Did not stratify by age or sex |
| 28 | Chen, 2016    | FOB Gold<br>Cut-off: 17 µg/g, and thresholds with positivity of 5% or 10%<br><br>1 sample               | Germany<br><br>20 gastroenterology practices in BLITZ study<br><br>Stool samples either frozen prior, or stool directly in test tube.<br><br>Dates of recruitment: 11/08-09/14 | Colonoscopy on all patients     | Inclusion: Undergoing screening colonoscopy<br><br>Exclusion: History of CRC or IBD, colonoscopy in the preceeding 5 years, inadequate bowel preparation, incomplete colonoscopy (cecum not reached)                                                              | N = 3466<br><br>Mean age: 62 +/- 6.4 years<br><br>Range: 50-79 years<br><br>Male: 50%                                                       | CRC 29/3466 0.84%<br><br>AA 354/3466 10% | 370/3466 10.7% | 23/29 96.6%             | 3095/3437 90%               | Standard: > 1 cm, villous components or high-grade dysplasia                                             | 116/354 32.8%             | 2861/3083 92.8%             | Funding: government<br><br>Did not stratify by age or sex                                                                                                                                                |
| 29 | Redwood, 2016 | OC-Sensor Diana<br>Cut-off: 20 µg/g<br><br>1 sample<br><br>Sent by mail, processing done at Mayo clinic | USA, Alaska<br><br>Asymptomatic persons with any degree of self-reported Alaska Native heritage who were 40 through 85 years                                                   | Colonoscopy on all patients     | Excluded patients if they (1) had undergone invasive screening tests in the previous 4 years or surveillance (i.e. CRC or polyp follow-up) in the previous 2 years, (2) had a history of                                                                          | N = 435 in the screening group<br><br>Median age: 52 years (IQR 50-59 years)<br><br>Female: 60%                                             | CRC 4/424 0.94%<br><br>AA 56/424 13.2%   | 34/424 8.0%    | 3/4 75%                 | 389/420 92.6%               | Standard                                                                                                 | 15/56 28.6%               | 349/364 95.9%               | Funding: foundation and industry<br><br>Included large proportion getting surveillance colonoscopy                                                                                                       |

Supplemental materials for “Accuracy of the Quantitative Fecal Immunochemical Test...”

|    |              |                                                                                                                          |                                                                                                                                                    |                             |                                                                                                                                                                                                                                                                                                                                                                                                                                                                                                                    |                                                                                                                                                  |                                             |                |                     |                         |                                                                              |              |                             |                                                                                                                                                                    |
|----|--------------|--------------------------------------------------------------------------------------------------------------------------|----------------------------------------------------------------------------------------------------------------------------------------------------|-----------------------------|--------------------------------------------------------------------------------------------------------------------------------------------------------------------------------------------------------------------------------------------------------------------------------------------------------------------------------------------------------------------------------------------------------------------------------------------------------------------------------------------------------------------|--------------------------------------------------------------------------------------------------------------------------------------------------|---------------------------------------------|----------------|---------------------|-------------------------|------------------------------------------------------------------------------|--------------|-----------------------------|--------------------------------------------------------------------------------------------------------------------------------------------------------------------|
|    |              |                                                                                                                          | old, were scheduled for average-risk screening or surveillance colonoscopy                                                                         |                             | upper GI cancer, (3) had overt hematochezia in the previous month, or (4) had inflammatory bowel disease or known hereditary CRC syndromes (e.g. Lynch syndrome, familial adenomatous polyposis)                                                                                                                                                                                                                                                                                                                   |                                                                                                                                                  |                                             |                |                     |                         |                                                                              |              |                             |                                                                                                                                                                    |
| 30 | Kim, 2017    | OC-Sensor<br>Cut-off: 20 µg/g<br><br>1 sample                                                                            | Dates of recruitment: 2007-2013                                                                                                                    | Colonoscopy on all patients | Exclusion criteria were as follows: Poor bowel preparation (n = 2574), lack of an adequate biopsy (n = 144), a history of CRC or colorectal surgery (n = 190), a history of IBD (N = 74), diagnosed with ischemic or infectious colitis during this study (n = 13), and subjects <30 years (n = 755)                                                                                                                                                                                                               | N = 26,316<br><br>Age range: 30-39 43%<br>40-49 40%<br>50+ 17%<br><br>Calculated mean age 42.4<br><br>Fam Hx of CRC 4%<br><br>Male: 72%          | CRC 16/26316 0.06%<br><br>AA 454/26316 1.7% | 805/26316 3.1% | 11/16 69%           | 25493/26302 97%         | >10 mm diameter, tubulovillous or villous structure and high-grade dysplasia | 88/454 19.3% | 25130/25846 97.2%           | Young population, therefore excluded from pooled prevalence<br><br>Funding: NR<br><br>Stratified by age (30-30, 40-40, and >= 50) but not by sex                   |
| 31 | Aniwan, 2017 | OC-Sensor<br>Cut-off: 5, 10, 20, 30, 40 µg/g<br><br>Automated analyzer machine (OC-Sensor DIANA machine)<br><br>1 sample | Thailand<br><br>Cross-sectional study<br><br>Health promotion program at the 6 university hospitals across Thailand.<br><br>Represents all regions | Colonoscopy on all patients | Inclusion: Asymptomatic participants, aged 50-75 years, health promotion program participants<br><br>Exclusion: Prior colon examination (endoscopy/radiologic imaging), previous colonic resection, previous history of CRC, IBD, and family history of hereditary CRC such as familial adenomatous polyposis and hereditary nonpolyposis colorectal cancer (at least 1 first degree relative with CRC before 60 years or at least 2 first degree relatives with CRC). Participants who had a positive FOBT in the | N = 1479<br><br>Mean age: 60.4 +/- 7.2<br><br>Range: 50-75 years<br><br>Male: 38.3%<br><br>254/1479 with 1 <sup>st</sup> degree family hx of CRC | CRC 14/1479 0.9%<br><br>AA 123/1479 8.3%    | 108/1479 7.3%  | 11/14 78.6% (49-95) | 1368/1465 93.4% (92-95) | >= 10 mm, villous adenoma, high-grade dysplasia                              | 20/123 16.2% | 1266/1342 94.3% (92.9-95.5) | Present results for Advanced Neoplasia = CRC + AA. Presumably 123 AAs.<br><br>Funding: Government, foundation and industry<br><br>Does not stratify by age or sex. |

Supplemental materials for “Accuracy of the Quantitative Fecal Immunochemical Test...”

|    |                     |                                                                                     |                                                                                                                            |                                                                                                                                                                                                                                                                         |                                                                                                                                                                                                                                                                                                                                                                                                                                                                                                                                      |                                                                                                                                                                                                                                                                                                                                                                                                                                                                                                                                      |                     |                  |            |                 |                          |                                                                                                                                        |
|----|---------------------|-------------------------------------------------------------------------------------|----------------------------------------------------------------------------------------------------------------------------|-------------------------------------------------------------------------------------------------------------------------------------------------------------------------------------------------------------------------------------------------------------------------|--------------------------------------------------------------------------------------------------------------------------------------------------------------------------------------------------------------------------------------------------------------------------------------------------------------------------------------------------------------------------------------------------------------------------------------------------------------------------------------------------------------------------------------|--------------------------------------------------------------------------------------------------------------------------------------------------------------------------------------------------------------------------------------------------------------------------------------------------------------------------------------------------------------------------------------------------------------------------------------------------------------------------------------------------------------------------------------|---------------------|------------------|------------|-----------------|--------------------------|----------------------------------------------------------------------------------------------------------------------------------------|
| 32 | Van der Vlugt, 2017 | OC-Sensor and FOB-Gold<br>Cut-off: 10 µg/g<br><br>1 sample in each round of testing | Netherlands<br><br>Screening-naïve part of biennial FIT-based CRC screening program<br><br>Dates of recruitment: 2006-2014 | FIT positive received colonoscopy; FIT negative were re-invited for screening biennially<br><br>CRC detected during screening and non-screening programs (FIT interval cancers, colonoscopy interval cancers)<br><br>Linked to Netherlands Cancer Registry through 3/15 | past year.<br>Inclusion: 50-74 years living in target areas; screening-naïve<br><br>Exclusion: From consecutive rounds: Participants who moved out of the area, those who had passed the upper age limit, institutionalized people, those with an estimated life expectancy of less than 5 years, those unable to give informed consent, and those who had tested positive in a previous screening round and had undergone a colonoscopy. Individuals with a history of IBD or CRC were advised not to participate in CRC screening. | N = 18716 (participated in FIT test)<br><br>Age range: 50-76 years<br><br>Round 1: MW (5028, median age 59 (54-65), male 2485, 49%); SW (9623, median age 60 (55-66), male 4779, 50%)<br>Round 2: MW (10198, median age 59 (54-65), male 4981, 49%); SW (8185, median age 61 (56-66), male 3962, 48%)<br>Round 3: MW (10032, median age 60 (55-66), male 4901, 49%); SW (9586, median age 60 (54-65), male 4648, 49%)<br>Round 4: MW (9517, median age 61 (57-67), male 4618, 49%); SW (9774, median age 61 (56-67), male 4672, 48%) | CRC 116/18716 0.62% | 2140/18716 11.4% | 89/116 77% | 16549/18600 89% | Not included in analysis | Funding: Netherlands Organization for Health Research and Development of the Dutch Ministry of Health<br><br>Stratified by age and sex |
|----|---------------------|-------------------------------------------------------------------------------------|----------------------------------------------------------------------------------------------------------------------------|-------------------------------------------------------------------------------------------------------------------------------------------------------------------------------------------------------------------------------------------------------------------------|--------------------------------------------------------------------------------------------------------------------------------------------------------------------------------------------------------------------------------------------------------------------------------------------------------------------------------------------------------------------------------------------------------------------------------------------------------------------------------------------------------------------------------------|--------------------------------------------------------------------------------------------------------------------------------------------------------------------------------------------------------------------------------------------------------------------------------------------------------------------------------------------------------------------------------------------------------------------------------------------------------------------------------------------------------------------------------------|---------------------|------------------|------------|-----------------|--------------------------|----------------------------------------------------------------------------------------------------------------------------------------|

Supplemental materials for “Accuracy of the Quantitative Fecal Immunochemical Test...”

|    |            |                                                                                                                                                |                                                                                                                                                                                                                                                 |                                                                                                                                                                                                                                          |                                                                                                                                                                                                                                                                                                                                                                                                                                                                                                                                                                                                                                                                                                                                      |                                                                                          |                                                   |                  |           |                  |  |  |  |                                                   |
|----|------------|------------------------------------------------------------------------------------------------------------------------------------------------|-------------------------------------------------------------------------------------------------------------------------------------------------------------------------------------------------------------------------------------------------|------------------------------------------------------------------------------------------------------------------------------------------------------------------------------------------------------------------------------------------|--------------------------------------------------------------------------------------------------------------------------------------------------------------------------------------------------------------------------------------------------------------------------------------------------------------------------------------------------------------------------------------------------------------------------------------------------------------------------------------------------------------------------------------------------------------------------------------------------------------------------------------------------------------------------------------------------------------------------------------|------------------------------------------------------------------------------------------|---------------------------------------------------|------------------|-----------|------------------|--|--|--|---------------------------------------------------|
| 33 | Haug, 2017 | OC-Sensor Micro<br>Cut-off: 10 µg/g<br><br>1 sample<br><br>Multiple threshold reported for alternative scenarios: 11, 14, 22, 36, 45, 50 ng/mL | Amsterdam<br><br>Prospective study was a random selection of the general Dutch population between 50 and 75 years of age in Nijmegen, Amsterdam, and surrounding areas<br><br>Ongoing population based CRC screening study that started in 2006 | Occurrence of CRC was determined by record linkage with the Dutch Comprehensive Cancer Center<br><br>Positive FIT50 received colonoscopy; patients with a negative colonoscopy were considered not to require FIT screening for 10 years | Inclusion:<br>Demographic data of all individuals aged 50-74 years living in the southwest of The Netherlands were obtained from municipal population registers to identify the target population. This population was screening-naïve since there was no CRC screening programme at the time of recruitment for this study.<br><br>Exclusion: History of CRC, IBD, an estimated life-expectancy of <5 years, a colonoscopy, sigmoidoscopy or double-contrast barium enema within the previous 3 years and inability to give consent. Subjects were no longer invited to subsequent rounds if they tested positive at a prior screening round, if they had become >75 years of age, if they had moved out of the region or had died. | N = 4253<br><br>Age range: 50-74 years<br><br>Mean age (SD): 60.5 (6.6)<br><br>Male: 48% | CRC 36/4523<br>0.795%<br><br>AA 180/4253<br>3.98% | 380/4523<br>8.4% | 22/25 88% | 4140/4498<br>92% |  |  |  | Funding: NR<br><br>Did not stratify by age or sex |
|----|------------|------------------------------------------------------------------------------------------------------------------------------------------------|-------------------------------------------------------------------------------------------------------------------------------------------------------------------------------------------------------------------------------------------------|------------------------------------------------------------------------------------------------------------------------------------------------------------------------------------------------------------------------------------------|--------------------------------------------------------------------------------------------------------------------------------------------------------------------------------------------------------------------------------------------------------------------------------------------------------------------------------------------------------------------------------------------------------------------------------------------------------------------------------------------------------------------------------------------------------------------------------------------------------------------------------------------------------------------------------------------------------------------------------------|------------------------------------------------------------------------------------------|---------------------------------------------------|------------------|-----------|------------------|--|--|--|---------------------------------------------------|

Supplemental materials for “Accuracy of the Quantitative Fecal Immunochemical Test...”

|    |               |                                                                         |                                                                                                         |                              |                                                                                                                                                                                                                                                                                                                                                                                                                                                                                                                                                                                                                                                                                                                                                                                                              |                                                                                                                      |                                                                 |                                  |                     |                    |          |                    |                    |                                                                                                                                                                                                                                                                                           |
|----|---------------|-------------------------------------------------------------------------|---------------------------------------------------------------------------------------------------------|------------------------------|--------------------------------------------------------------------------------------------------------------------------------------------------------------------------------------------------------------------------------------------------------------------------------------------------------------------------------------------------------------------------------------------------------------------------------------------------------------------------------------------------------------------------------------------------------------------------------------------------------------------------------------------------------------------------------------------------------------------------------------------------------------------------------------------------------------|----------------------------------------------------------------------------------------------------------------------|-----------------------------------------------------------------|----------------------------------|---------------------|--------------------|----------|--------------------|--------------------|-------------------------------------------------------------------------------------------------------------------------------------------------------------------------------------------------------------------------------------------------------------------------------------------|
| 34 | Shapiro, 2017 | OC FIT-CHEK<br>Cut-off: 20 µg/g<br><br>1 sample                         | USA<br><br>Clinics in Minneapolis and Indianapolis metro areas<br><br>Dates of recruitment: 05/11-07/14 | Colonoscopy for all patients | Inclusion: Asymptomatic patients aged 50-75 years who were scheduled to have a colonoscopy for CRC screening<br><br>Exclusion: Having colonoscopy due to bleeding or other symptoms, positive or abnormal flexible sigmoidoscopy, double-contrast barium enema, computed tomographic colonography or FOBT. Patients were also eligible if they had >1 episode of rectal bleeding in the past 6 months, a personal history of CRC or colorectal polyps, a positive FOBT in the past 12 months, a colonoscopy within the past 5 years, a prior colon resection or other colon/rectal surgery, a history of IBD, a personal or family history of familial adenomatous polyposis or hereditary nonpolyposis colorectal cancer, were currently taking anticoagulant medication, or were not able to read English. | N = 1006<br><br>Age:<br>50-54 15.9%<br>55-59 22.6%<br>60-75 61.5%<br><br>Mean average: 55.6 years<br><br>Male: 45.5% | CRC 2/1006 0.2%<br><br>AA 53/1006 5.3%<br><br>AN 55/1006 5.4%   | AN from OC Sensor at 20 µg/g: 3% | 0/2 0%              | 917/945 97%        | Standard | 6/38 15.8%         | 282/291 96.9%      | Including participants with a family history of CRC, and cancer screening history<br><br>Funding: The Division of Cancer Prevention and Control, Centers for Disease Control and Prevention provided financial support for the study through a contract with Battelle Memorial Institute. |
| 35 | Gies, 2018    | CAREprime<br>Cut-off: 6.3 (primary), 7, 12, 15, 26 µg/g<br><br>1 sample | Southern Germany<br><br>Prospective, cohort study conducted with 20 gastroenterology                    | Colonoscopy for all patients | Inclusion: Targeted selection of all eligible 216 cases with CRC or AA, and random selection of 300 participants without CRC and AA from about 1,600 eligble                                                                                                                                                                                                                                                                                                                                                                                                                                                                                                                                                                                                                                                 | N = 516<br><br>Age range: 50-79 years<br><br>Mean age: 63.2 years                                                    | CRC 16/516 3.1%<br><br>AA 200/516 38.8%<br><br>AN 216/516 41.8% | 71/516 13.8%                     | 13/16 81.3% (54-96) | 442/500 88.4%      | Standard | 62/200 31% (25-38) | 274/300 91.3%      | Used a case-control design. Included all cancers from the Blitz cohort, as well as 200 advanced adenomas, then                                                                                                                                                                            |
| 36 | Gies, 2018    | Hb Elisa<br>Cut-off: 2                                                  |                                                                                                         |                              |                                                                                                                                                                                                                                                                                                                                                                                                                                                                                                                                                                                                                                                                                                                                                                                                              |                                                                                                                      |                                                                 | 103/500 20.6%                    | 13/1681.3% (54-96)  | 410/500 81.9% (79- |          | 87/200 43.5%       | 257/300 85.7% (81- |                                                                                                                                                                                                                                                                                           |

Supplemental materials for “Accuracy of the Quantitative Fecal Immunochemical Test...”

|    |             |                                                                   |                                                                                                                    |                                       |                                                                                                                                                                                                                            |                                                                            |                                                                                                                        |                                      |                                                                                                                                                                                  |                                                                        |                        |                    |                                                                                                                              |                                                                                                      |
|----|-------------|-------------------------------------------------------------------|--------------------------------------------------------------------------------------------------------------------|---------------------------------------|----------------------------------------------------------------------------------------------------------------------------------------------------------------------------------------------------------------------------|----------------------------------------------------------------------------|------------------------------------------------------------------------------------------------------------------------|--------------------------------------|----------------------------------------------------------------------------------------------------------------------------------------------------------------------------------|------------------------------------------------------------------------|------------------------|--------------------|------------------------------------------------------------------------------------------------------------------------------|------------------------------------------------------------------------------------------------------|
|    |             | (primary), 5, 15, 29 µg/g<br>1 sample                             | practices in Southern Germany. Enriched with CRC cases recruited in another study.                                 |                                       | participants of screening colonoscopy, with stool samples provided in 60 mL collection containers                                                                                                                          | Male: 55.6%                                                                |                                                                                                                        |                                      |                                                                                                                                                                                  | 85)                                                                    |                        | (37-51)            | 89)                                                                                                                          | completed with 300 from screening cohort; used stool samples that have been stored for several years |
| 37 | Gies, 2018  | OC Sensor<br>Cut-off: 4, 7, 10 (primary), 15, 18 µg/g             | Dates of recruitment: 2005-2010                                                                                    |                                       | Exclusion: Not between 50-79 years, IBD, personal history of CRC, adenoma or polyps; previous colonoscopy in previous 5 years; stool sampling not before colonoscopy; incomplete colonoscopy; incomplete bowel preparation |                                                                            | 33/516, 6.4%                                                                                                           | 11/16 68.8% (41-89)                  | 478/500 95.6% (94-97)                                                                                                                                                            |                                                                        |                        | 36/200 18% (13-24) | 293/300 97.7% (95-99)                                                                                                        | Funding source: government, foundation and industry                                                  |
| 38 | Gies, 2018  | RIDASCREEN Hb<br>Cut-off: 8 (primary), 12, 15, 30 µg/g            |                                                                                                                    |                                       |                                                                                                                                                                                                                            |                                                                            | 77/516 14.9%                                                                                                           | 13/16 81.3% (54-96)                  | 436/500 87.2% (84-90)                                                                                                                                                            | 72/200 36% (29-43)                                                     | 272/300 90.7% (87-94)  |                    |                                                                                                                              |                                                                                                      |
| 39 | Gies, 2018  | FOB-Gold<br>Cut-off: 2, 15, 17 (primary), 18, 53 µg/g             |                                                                                                                    |                                       |                                                                                                                                                                                                                            |                                                                            | 38/516 7.4%                                                                                                            | 1/16 68.8% (41-89)                   | 473/500 94.5% (92-96)                                                                                                                                                            | 36/200 18% (13-24)                                                     | 289/300 96.3% (94-98)  |                    |                                                                                                                              |                                                                                                      |
| 40 | Gies, 2018  | Eurolyser FOB test<br>Cut-off: 2, 6, 8, 15, 21 µg/g               |                                                                                                                    |                                       |                                                                                                                                                                                                                            |                                                                            | 35/516 4.8%                                                                                                            | 10/16 62.5% (35-85)                  | 475/500 86.7% (84-90)                                                                                                                                                            | 39/200 19.5% (14-26)                                                   | 291/300 97% (94-97)    |                    |                                                                                                                              |                                                                                                      |
| 41 | Gies, 2018  | ImmoCare-C<br>Cut-off: 6, 6. 25 (primary), 9, 15, 17, 37 µg/g     |                                                                                                                    |                                       |                                                                                                                                                                                                                            |                                                                            | 79/516 15.3%                                                                                                           | 13/16 81.3% (54-96)                  | 434/500 86.8% (84-90)                                                                                                                                                            | 70/200 35.2% (29/42)                                                   | 270/300 90% (86-93)    |                    |                                                                                                                              |                                                                                                      |
| 42 | Gies, 2018  | QuantOn Hem<br>Cut-off: 3.7 (primary), 4, 10, 15, 18, 30 µg/g     |                                                                                                                    |                                       |                                                                                                                                                                                                                            |                                                                            | 102/516 19.8%                                                                                                          | 13/16 81.3% (54-96)                  | 411/500 82.2% (79-85)                                                                                                                                                            | 83/200 41.5% (35-49)                                                   | 257/300 85.7% (81-89)  |                    |                                                                                                                              |                                                                                                      |
| 43 | Gies, 2018  | QuikRead go iFOBT<br>Cut-off: 15 (primary), 23 µg/g               |                                                                                                                    |                                       |                                                                                                                                                                                                                            |                                                                            | 36/516 7.0%                                                                                                            | 10/16 62.5% (35-85)                  | 474/500 94.7% (93-97)                                                                                                                                                            | 37/200 18.5% (13-25)                                                   | 290/300 96.7% (94-98)  |                    |                                                                                                                              |                                                                                                      |
| 44 | Chen, 2018  | OC-Sensor<br>Cut-off: 20 µg/g<br><br>1 sample                     |                                                                                                                    |                                       |                                                                                                                                                                                                                            |                                                                            | Taiwan<br><br>National screening program<br><br>Follow-up with nationwide cancer registry from entry until end of 2009 | Cancer registry follow-up to 2 years | Participants aged 50 to 69 years who attended biennial nationwide CRC screening program with FIT between Jan 1, 2004 and Dec 31, 2009. Only those completing OC-Sensor included. | N = 723,113<br><br>Average age (calculated): 59 years<br><br>Male: 38% | CRC 2005/723113 0.277% | 28390/723113 4.0%  | 1496/2005 74.6%                                                                                                              |                                                                                                      |
| 45 | Selby, 2018 | OC-Sensor Diana<br>Cut-off: 20 µg/g<br><br>Sent by mail, 1 sample | USA, California<br><br>Organized FIT-based mailed out-reach programs from Kaiser Northern and Southern California. | Cancer registry follow-up for 2 years | Individuals were eligible if they had a quantitative FIT result available between January 1, 2013 and December 31, 2014, irrespective of whether it was their first-ever FIT; were                                         | N = 640,859<br><br>Average age (calculated): 61.5 years<br><br>Female: 53% | CRC 1245/640859 0.19%                                                                                                  | 48561/640859 7.6%                    | 925/1245 74.3%                                                                                                                                                                   | 591978/639614 92.6%                                                    | N/A                    |                    | Used programmatic sensitivity, which is proportion with cancer who had a positive FIT at baseline or follow-up. Programmatic |                                                                                                      |

Supplemental materials for “Accuracy of the Quantitative Fecal Immunochemical Test...”

|    |             |                                                                                                                                  |                                                                                                                                                    |                             |                                                                                                                                                                                                                                                                                                                                                              |                                                                                               |                      |                  |           |                     |                                |                  |                    |                                                                                                                                                                                   |
|----|-------------|----------------------------------------------------------------------------------------------------------------------------------|----------------------------------------------------------------------------------------------------------------------------------------------------|-----------------------------|--------------------------------------------------------------------------------------------------------------------------------------------------------------------------------------------------------------------------------------------------------------------------------------------------------------------------------------------------------------|-----------------------------------------------------------------------------------------------|----------------------|------------------|-----------|---------------------|--------------------------------|------------------|--------------------|-----------------------------------------------------------------------------------------------------------------------------------------------------------------------------------|
|    |             |                                                                                                                                  | Retrospective cohort, using programmatic sens/spec. Those with quantitative FIT available 01/13-12/14, with two years follow-up in cancer registry |                             | 50-75 years of age; were at average risk for CRC (no personal history of CRC, total colectomy, or IBD); had been members of the health system for >2 years before the test result date, to capture prior endoscopy examinations or FIT; and were members for >2 years after the test result date or until their CRC diagnosis date if it was within 2 years. |                                                                                               |                      |                  |           |                     |                                |                  |                    | specificity is proportion without cancer with all negative results.<br><br>Funding: government                                                                                    |
| 46 | Liles, 2018 | OC-Auto FIT<br>Cut-off: 20 µg/g<br><br>Two kits sent by mail, to be completed on separate days<br><br>Only 1-sample results used | USA, Kaiser Permanente Northwest, HMO<br><br>Members receiving referral for screening colonoscopy between 12/11-06/14                              | Colonoscopy on all patients | Exclusion: High-risk diagnosis, recent endoscopy, not medically indicated (dementia, nursing home, hospice), needs interpreter, opt out of study                                                                                                                                                                                                             | N = 2771<br><br>Average age (calculated): 60.0<br><br>Female: 51%<br><br>Family history: 5.2% | CRC 2/2771<br>0.072% | 116/2771<br>4.2% | 2/2, 100% | 2655/2769,<br>95.9% | Standard (currently + cancers) | 28/209,<br>13.4% | 2473/2560<br>96.6% | Author provided results for cancer sensitivity and specificity<br><br>Funding source: government, Polymedco supplied test kits and analyzer<br><br>Did not stratify by age or sex |

Figure 2: QUADAS-2 overview of study quality for included studies/cohorts

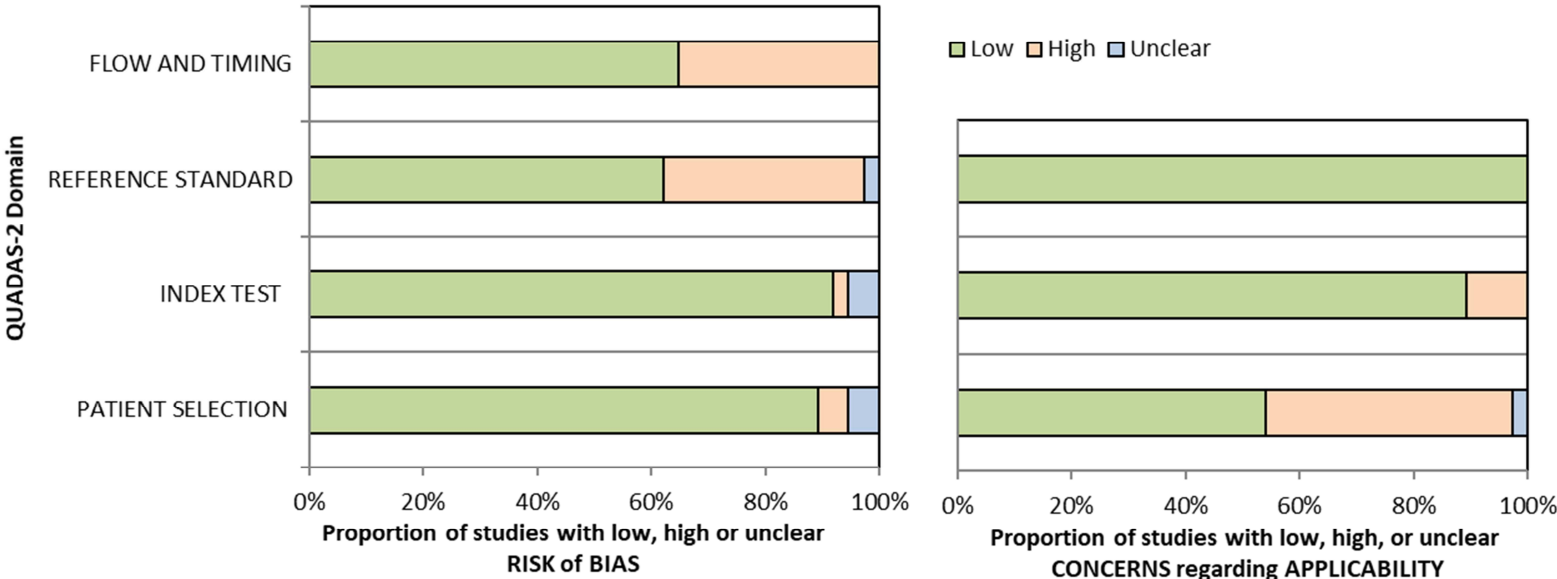



Supplemental materials for “Accuracy of the Quantitative Fecal Immunochemical Test...”

Table 5: Detailed QUADAS assessment for individual studies

| Author, Year<br>(Reference) | Risk of Bias      |              |                    |                 | Applicability Concerns |            |                    |
|-----------------------------|-------------------|--------------|--------------------|-----------------|------------------------|------------|--------------------|
|                             | Patient Selection | Index Test   | Reference Standard | Flow and Timing | Patient Selection      | Index Test | Reference Standard |
| Itoh, 1996                  | Low risk          | Low risk     | High risk          | High risk       | Low risk               | Low risk   | Low risk           |
| Nakama, 2001                | Low risk          | Low risk     | Low risk           | Low risk        | High risk              | Low risk   | Low risk           |
| Liu, 2003                   | Low risk          | Low risk     | Low risk           | Low risk        | High risk              | Low risk   | Low risk           |
| Morikawa, 2005              | Low risk          | Low risk     | Low risk           | Low risk        | High risk              | Low risk   | Low risk           |
| Launoy, 2005                | Low risk          | Low risk     | High risk          | High risk       | Low risk               | Low risk   | Low risk           |
| Sohn, 2005                  | Low risk          | Unclear risk | Unclear risk       | Low risk        | High risk              | High risk  | Low risk           |
| Nakazato, 2006              | Low risk          | Low risk     | Low risk           | Low risk        | High risk              | Low risk   | Low risk           |
| Levi, 2007                  | Low risk          | Low risk     | Low risk           | Low risk        | High risk              | Low risk   | Low risk           |
| Castiglione, 2007           | Low risk          | Low risk     | High risk          | High risk       | Low risk               | Low risk   | Low risk           |
| Graser, 2009                | Unclear risk      | Low risk     | Low risk           | Low risk        | Low risk               | Low risk   | Low risk           |
| Park, 2010                  | Low risk          | Low risk     | Low risk           | Low risk        | Low risk               | Low risk   | Low risk           |
| Levi, 2011                  | Low risk          | Low risk     | High risk          | High risk       | Low risk               | Low risk   | Low risk           |
| Chen, 2011                  | Low risk          | Low risk     | High risk          | High risk       | Low risk               | Low risk   | Low risk           |
| DeWijkersloot, 2012         | Low risk          | Low risk     | Low risk           | Low risk        | High risk              | High risk  | Low risk           |
| Wong, 2012                  | Low risk          | Low risk     | Low risk           | Low risk        | High risk              | Low risk   | Low risk           |
| Brenner and Tao, 2013       | Low risk          | Low risk     | Low risk           | Low risk        | Low risk               | High risk  | Low risk           |
| Shin, 2013                  | Low risk          | High risk    | High risk          | High risk       | Low risk               | Low risk   | Low risk           |
| Imperiale, 2014             | Low risk          | Low risk     | Low risk           | Low risk        | Low risk               | Low risk   | Low risk           |
| Hernandez, 2014             | Low risk          | Low risk     | Low risk           | Low risk        | High risk              | Low risk   | Low risk           |
| Johnson, 2014               | Low risk          | Unclear risk | Low risk           | Low risk        | Low risk               | Low risk   | Low risk           |
| Symonds, 2015               | Unclear risk      | Low risk     | Low risk           | Low risk        | Unclear risk           | Low risk   | Low risk           |
| Stegeman, 2015              | Low risk          | Low risk     | High risk          | High risk       | Low risk               | Low risk   | Low risk           |
| Lee, 2015                   | Low risk          | Low risk     | Low risk           | Low risk        | Low risk               | Low risk   | Low risk           |
| Jensen, 2016                | Low risk          | Low risk     | High risk          | High risk       | Low risk               | Low risk   | Low risk           |
| Chen, 2016                  | Low risk          | Low risk     | High risk          | High risk       | Low risk               | Low risk   | Low risk           |
| Kim, 2016                   | High risk         | Low risk     | Low risk           | Low risk        | High risk              | Low risk   | Low risk           |
| Chen and Warner, 2016       | Low risk          | Low risk     | Low risk           | Low risk        | Low risk               | High risk  | Low risk           |
| Redwood, 2016               | High risk         | Low risk     | Low risk           | Low risk        | High risk              | Low risk   | Low risk           |
| Kim, 2017                   | Low risk          | Low risk     | Low risk           | Low risk        | High risk              | Low risk   | Low risk           |
| Aniwan, 2017                | Low risk          | Low risk     | Low risk           | Low risk        | High risk              | Low risk   | Low risk           |
| Van der Vlugt, 2017         | Low risk          | Low risk     | High risk          | High risk       | Low risk               | Low risk   | Low risk           |
| Haug, 2017                  | Low risk          | Low risk     | High risk          | High risk       | Low risk               | Low risk   | Low risk           |
| Shapiro, 2017               | Low risk          | Low risk     | Low risk           | Low risk        | High risk              | Low risk   | Low risk           |

Supplemental materials for “Accuracy of the Quantitative Fecal Immunochemical Test...”

|             |          |          |           |           |           |           |          |
|-------------|----------|----------|-----------|-----------|-----------|-----------|----------|
| Gies, 2018  | Low risk | Low risk | Low risk  | Low risk  | Low risk  | High risk | Low risk |
| Chen, 2018  | Low risk | Low risk | High risk | High risk | Low risk  | Low risk  | Low risk |
| Selby, 2018 | Low risk | Low risk | High risk | High risk | Low risk  | Low risk  | Low risk |
| Liles, 2018 | Low risk | Low risk | Low risk  | Low risk  | High risk | Low risk  | Low risk |

Journal Pre-proof

Supplemental materials for “Accuracy of the Quantitative Fecal Immunochemical Test...”

Figures 3A-D: Colorectal cancer detection at varying quantitative thresholds using all available positivity thresholds, from studies with colonoscopy follow-up

A. Positivity thresholds  $\leq 10 \mu\text{g/g}$

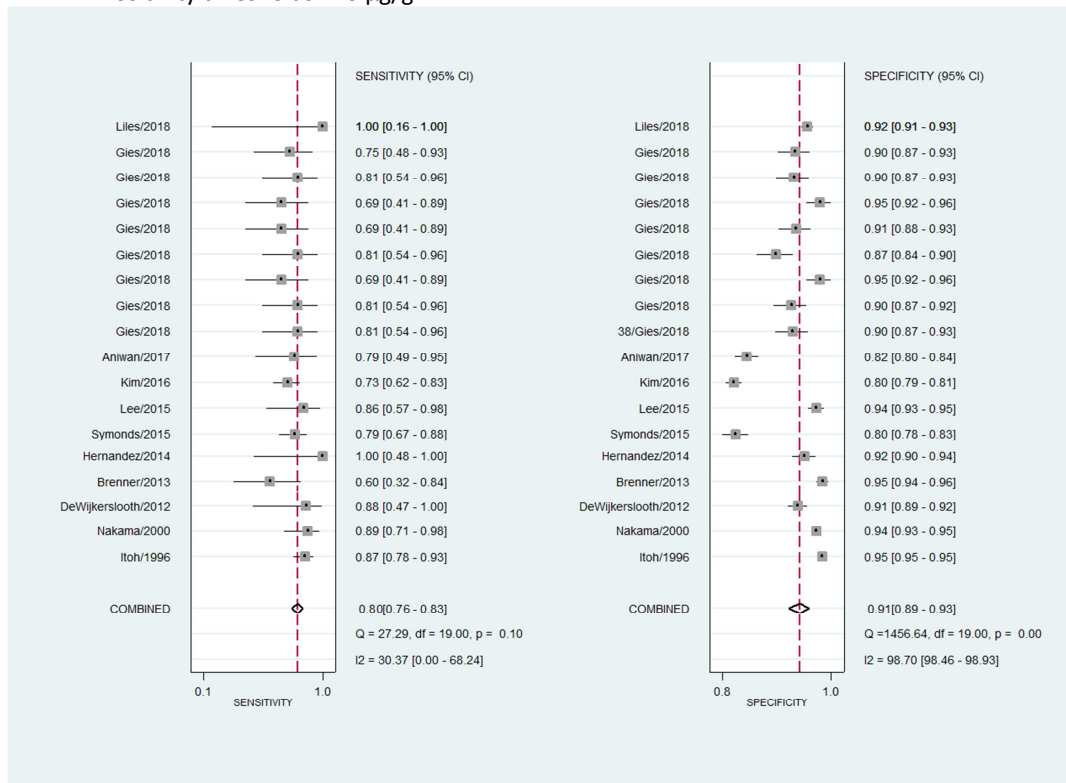

B. Positivity thresholds  $>10$  and  $\leq 20 \mu\text{g/g}$

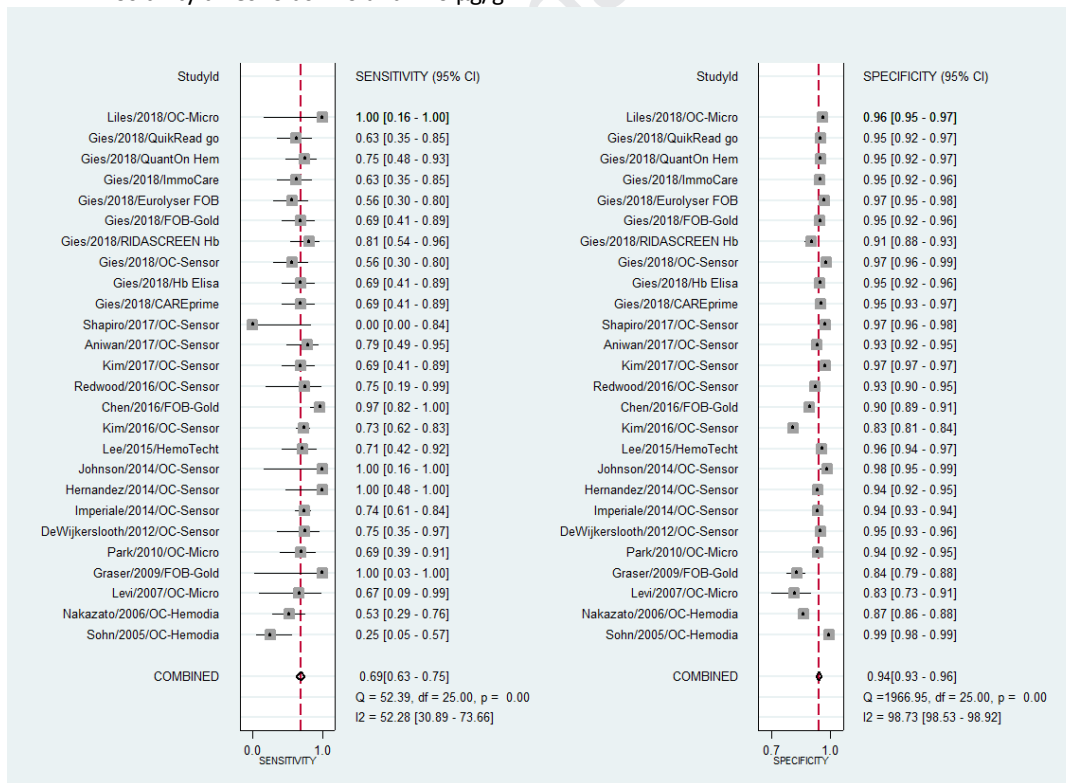

Supplemental materials for “Accuracy of the Quantitative Fecal Immunochemical Test...”

C. Positivity thresholds >20 and ≤30 µg/g

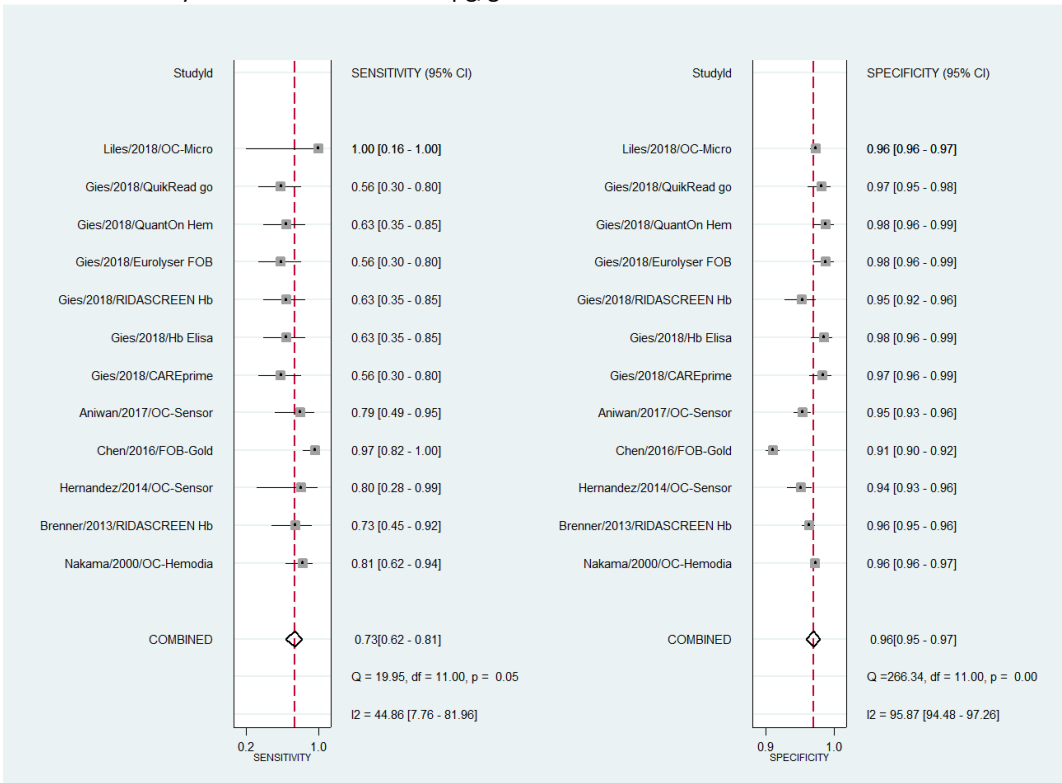

D. Positivity thresholds >30 µg/g

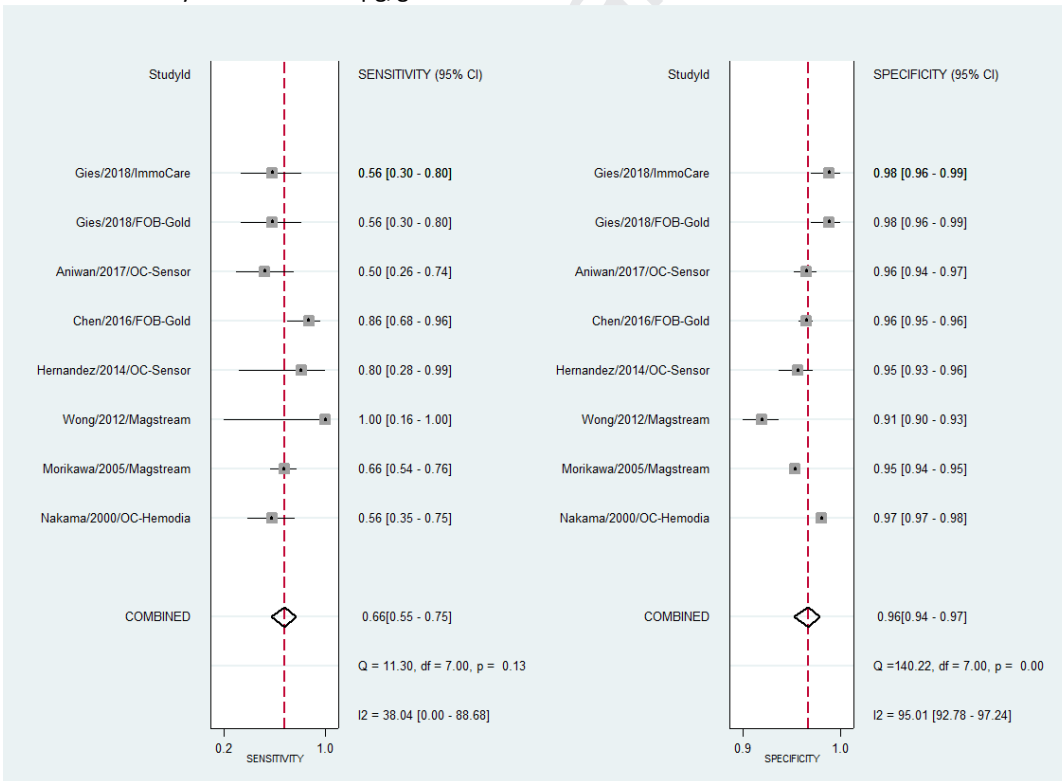

## Supplemental materials for “Accuracy of the Quantitative Fecal Immunochemical Test...”

Figures 4A-D: Advanced adenoma detection at varying quantitative thresholds using all available positivity thresholds, from studies with colonoscopy follow-up

### A. Positivity thresholds $\leq 10 \mu\text{g/g}$

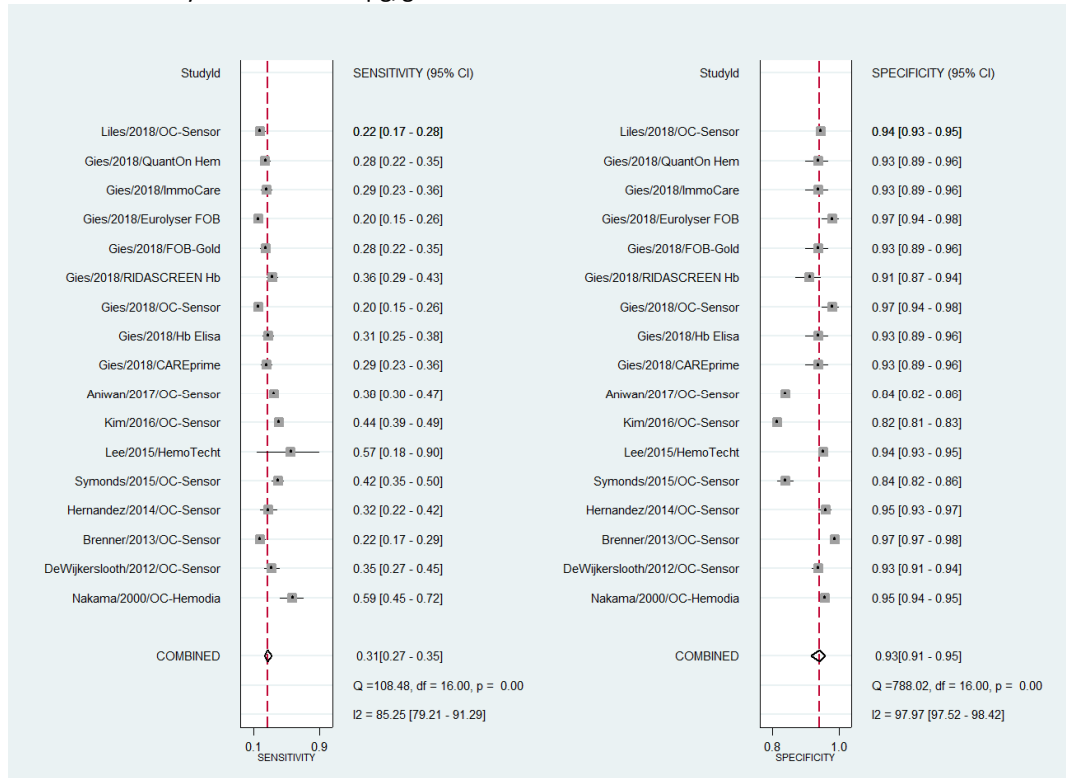

### B. Positivity thresholds $>10$ and $\leq 20 \mu\text{g/g}$

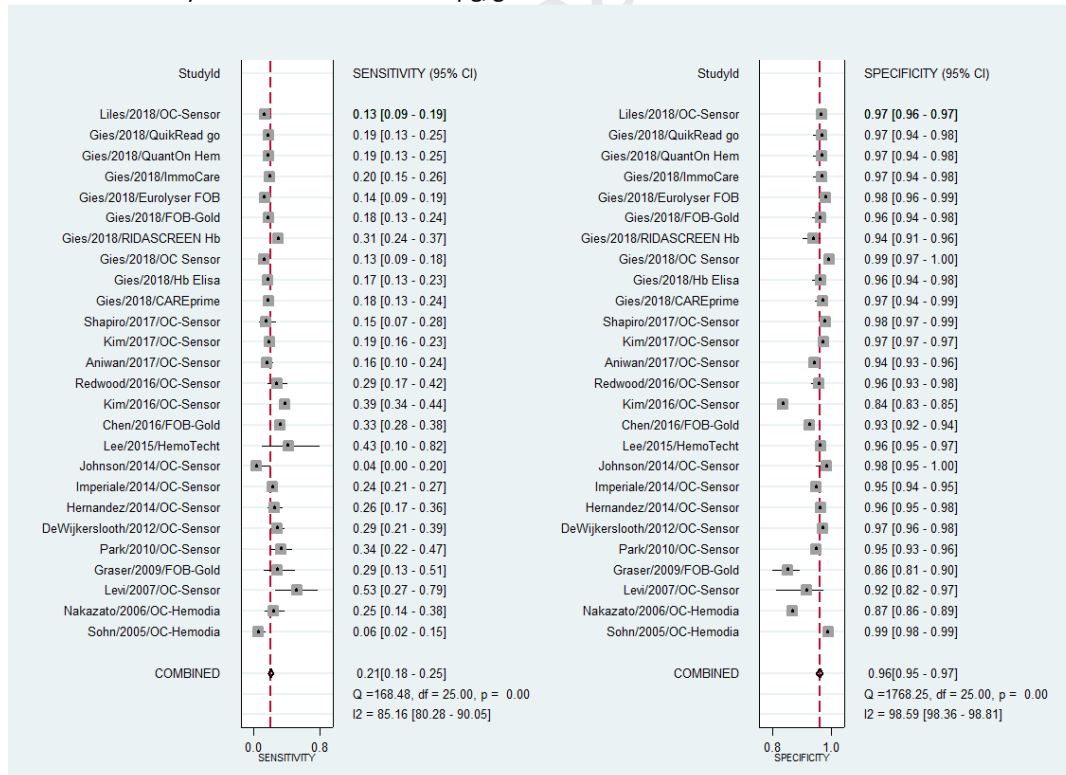

Supplemental materials for “Accuracy of the Quantitative Fecal Immunochemical Test...”

C. Positivity thresholds >20 and ≤30 µg/g

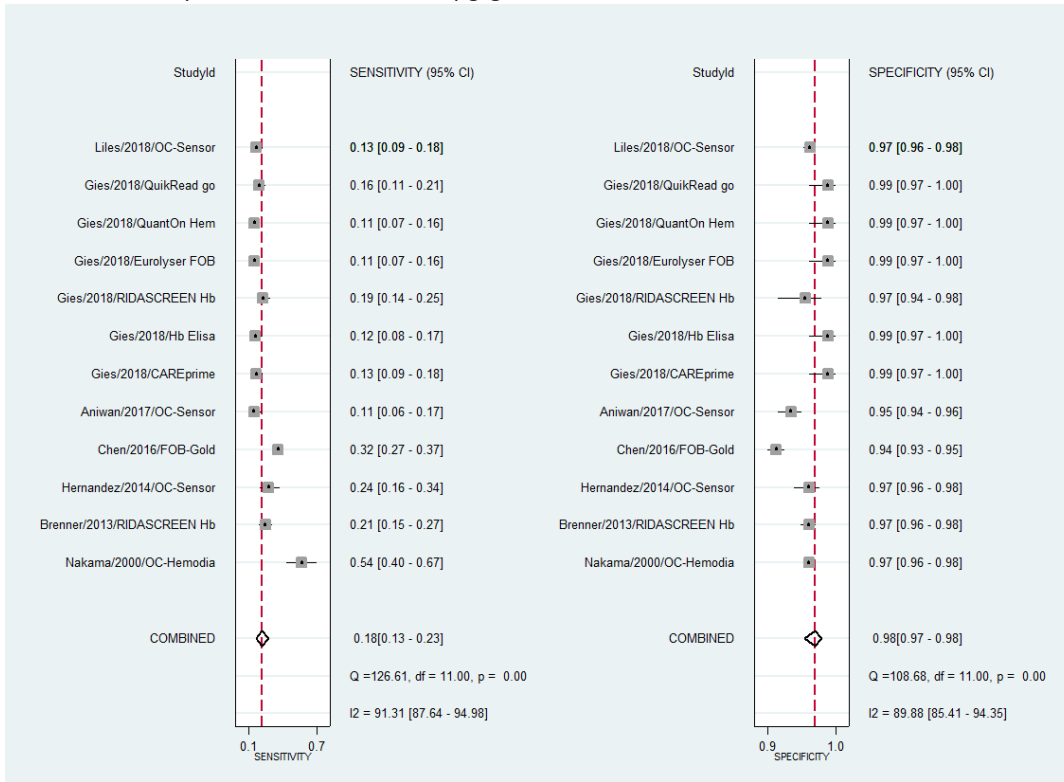

D. Positivity thresholds >30 µg/g

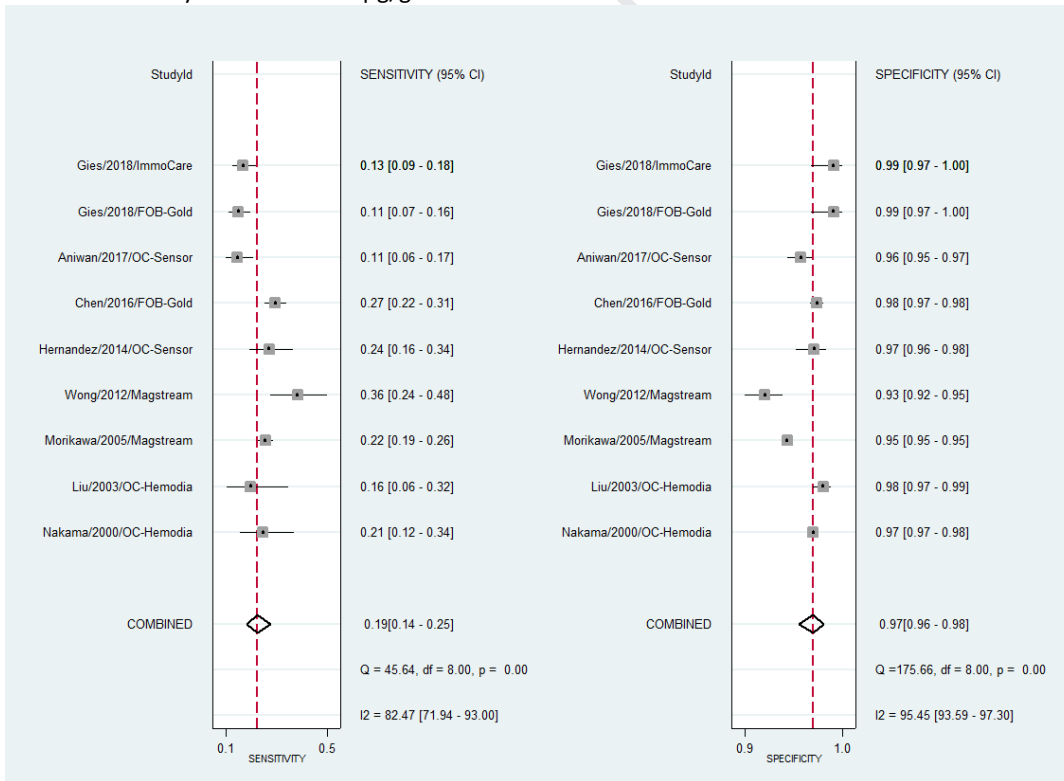

Supplemental materials for “Accuracy of the Quantitative Fecal Immunochemical Test...”

Figure 5: Colorectal cancer detection, using the primary positivity threshold from all included studies

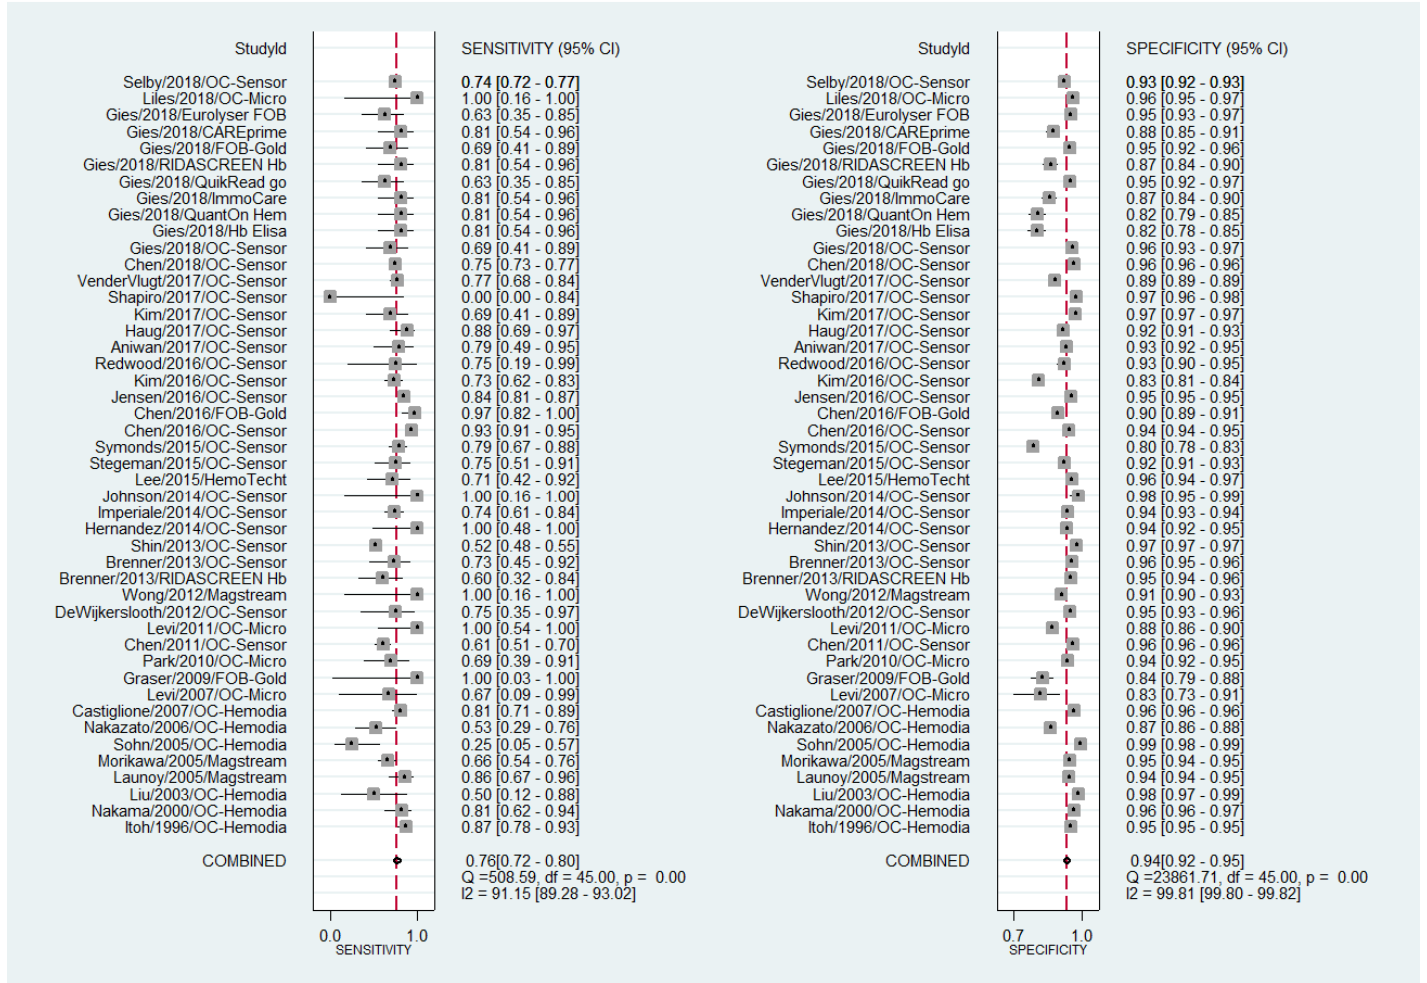

Supplemental materials for "Accuracy of the Quantitative Fecal Immunochemical Test..."

Figure 6: Summary receiver operating characteristic for colorectal cancer detection, using the primary positivity threshold of all included studies

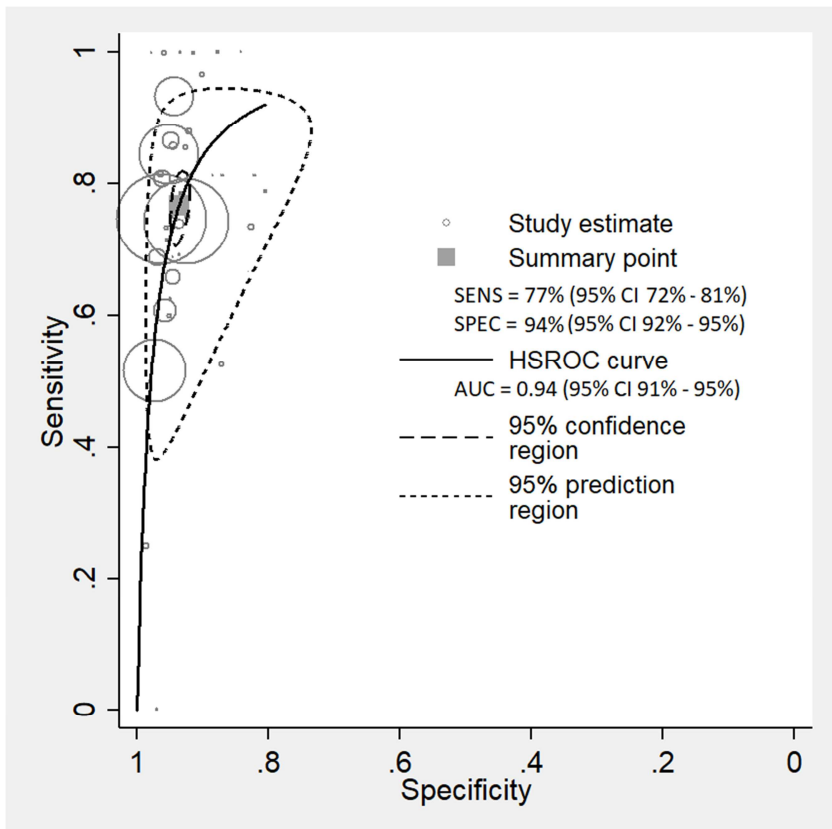



Supplemental materials for “Accuracy of the Quantitative Fecal Immunochemical Test...”

Figure 7: Sensitivity analyses for sensitivity and specificity of FIT for colorectal cancer detection including all studies, based on exclusion of select studies

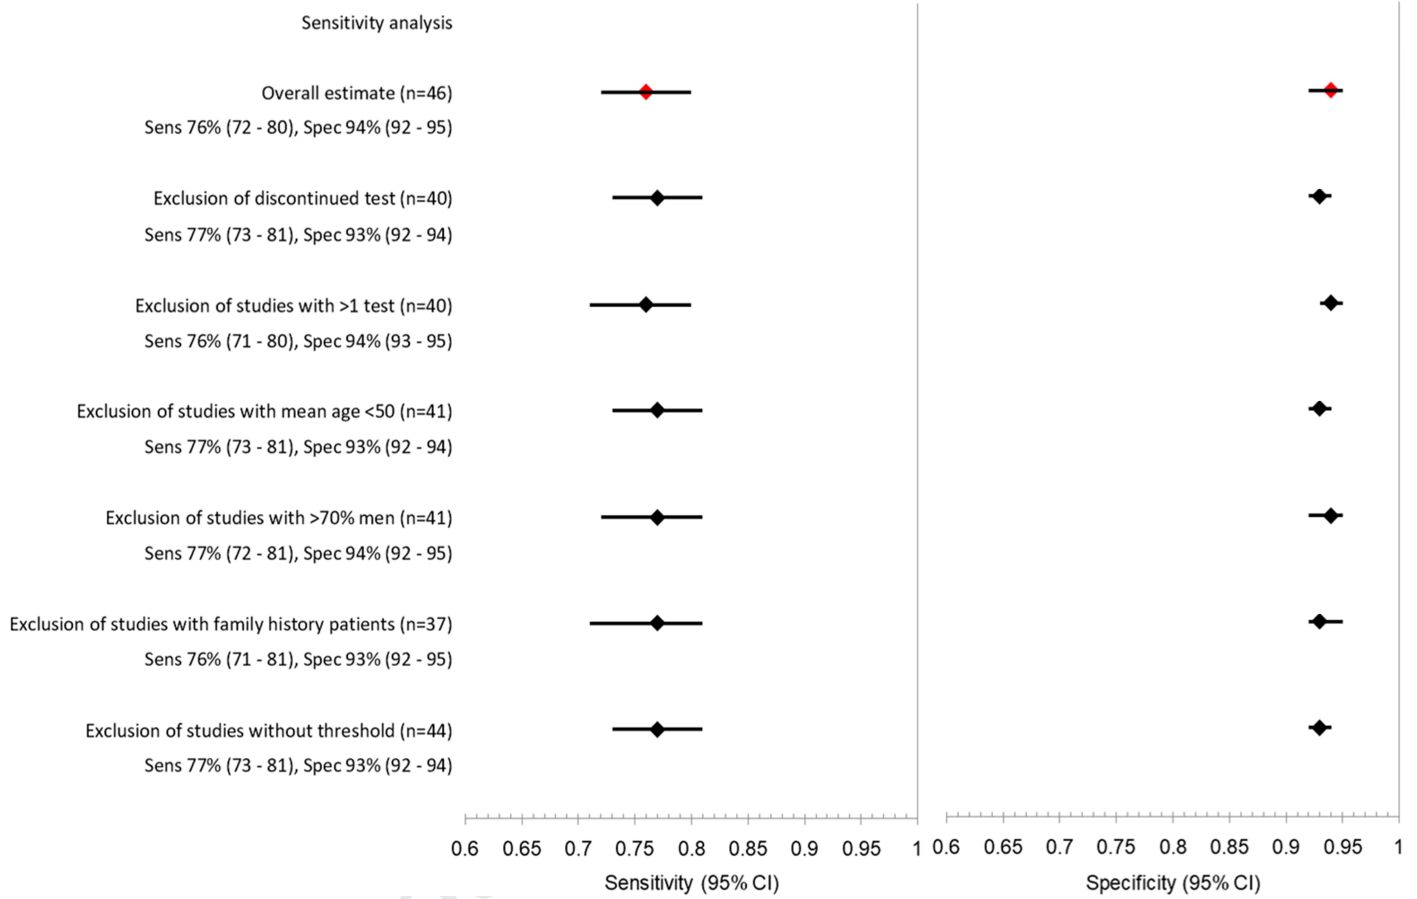

Supplemental materials for “Accuracy of the Quantitative Fecal Immunochemical Test...”

Figure 8: Advanced adenoma detection, using the primary positivity threshold of all studies reporting sensitivity and specificity for advanced adenomas

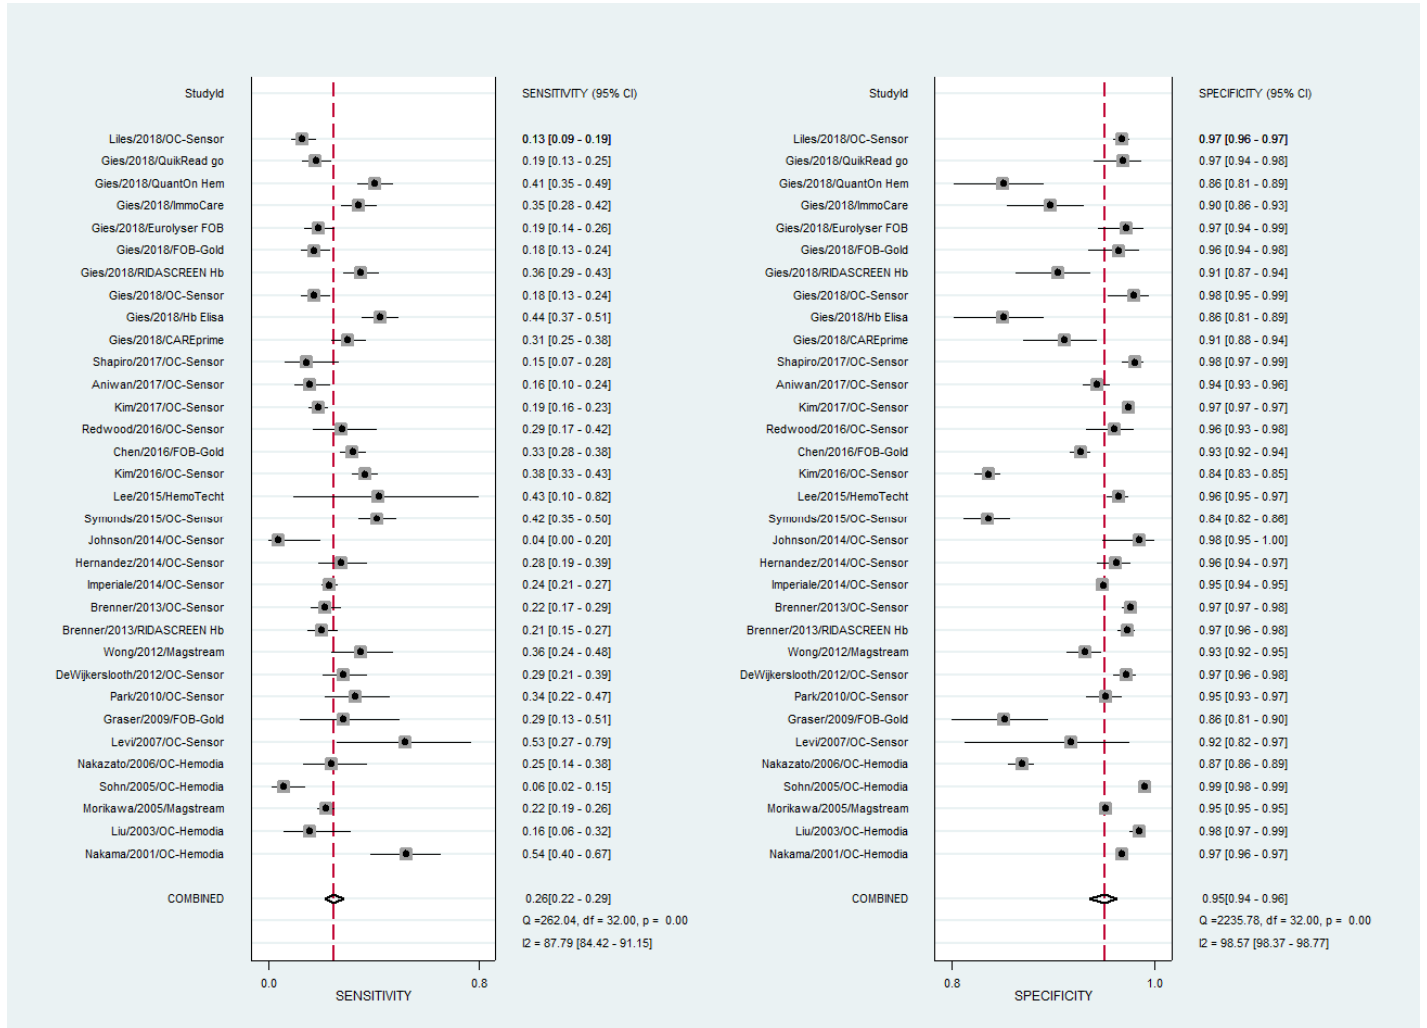

Supplemental materials for "Accuracy of the Quantitative Fecal Immunochemical Test..."

Figure 9: Summary receiver operating characteristic curve for advanced adenoma detection, using the primary positivity threshold of all included studies

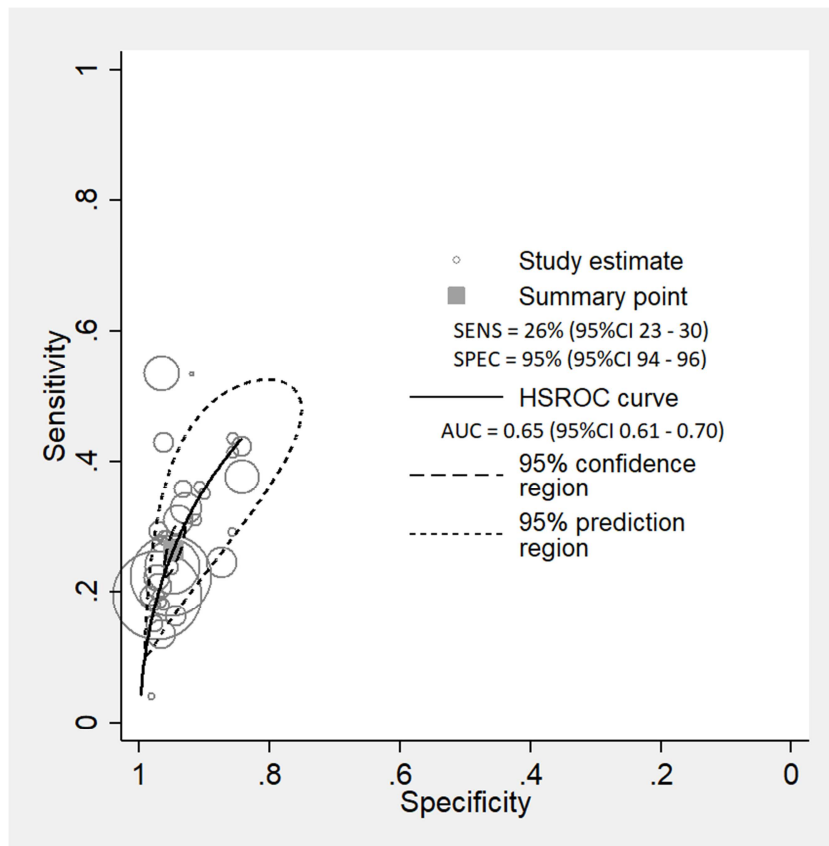

Supplemental materials for “Accuracy of the Quantitative Fecal Immunochemical Test...”

Figures 10A-B: Colorectal cancer detection of the OC-Sensor test using all available positivity thresholds from only studies with colonoscopy follow-up

A. Positivity thresholds  $\leq 10 \mu\text{g/g}$

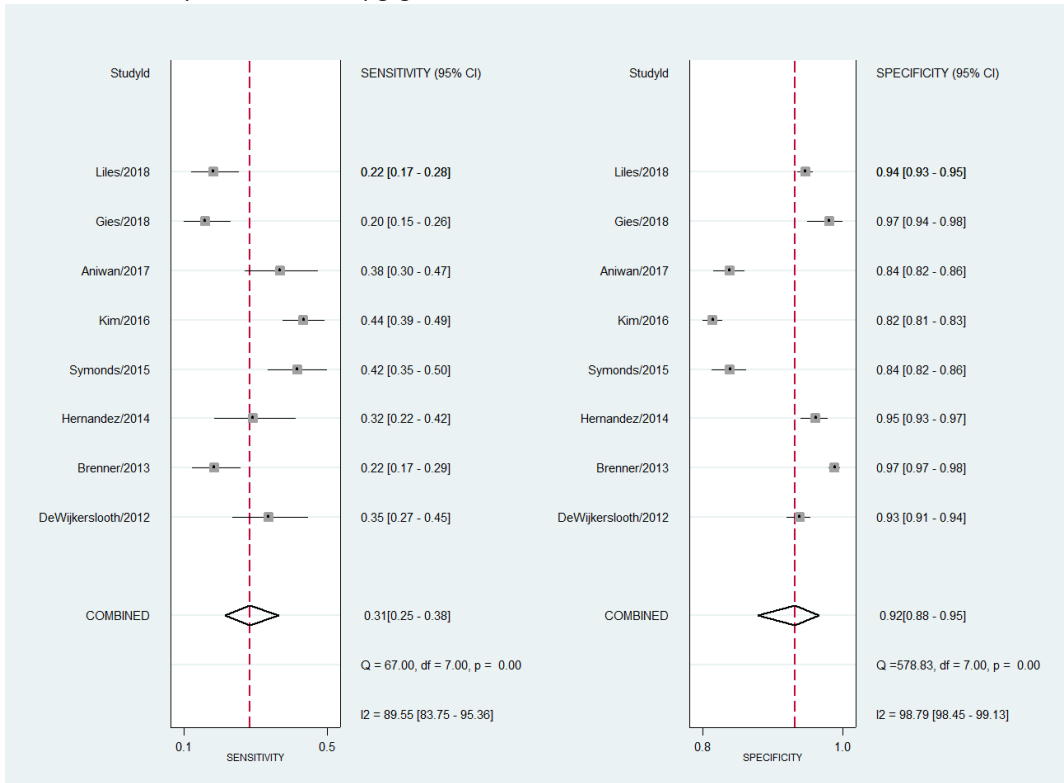

B. Positivity thresholds  $>10$  and  $\leq 20 \mu\text{g/g}$

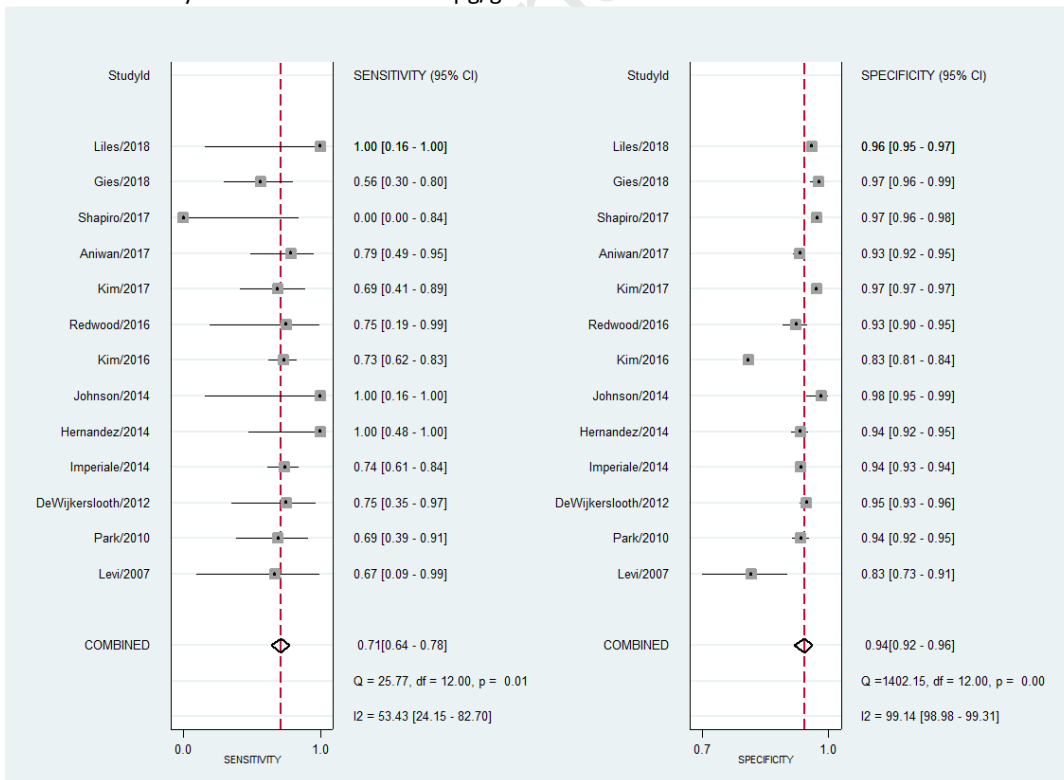

Supplemental materials for "Accuracy of the Quantitative Fecal Immunochemical Test..."

C. Positivity thresholds >20 µg/g

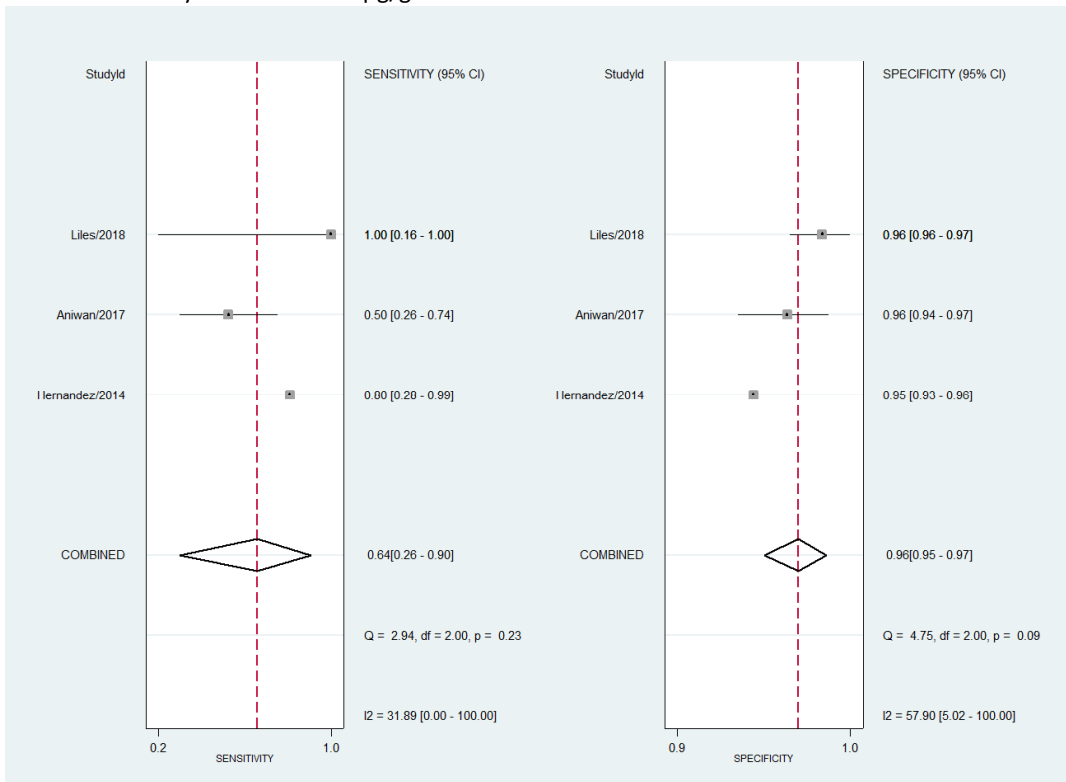

Supplemental materials for “Accuracy of the Quantitative Fecal Immunochemical Test...”

Figures 11A-B: Advanced adenoma detection of the OC-Sensor test using all available positivity thresholds from only studies with colonoscopy follow-up. Pooled analyses were not possible >20 µg/g because of inadequate number of studies.

A. Positivity thresholds ≤10 µg/g



B. Positivity thresholds >10 and ≤20 µg/g

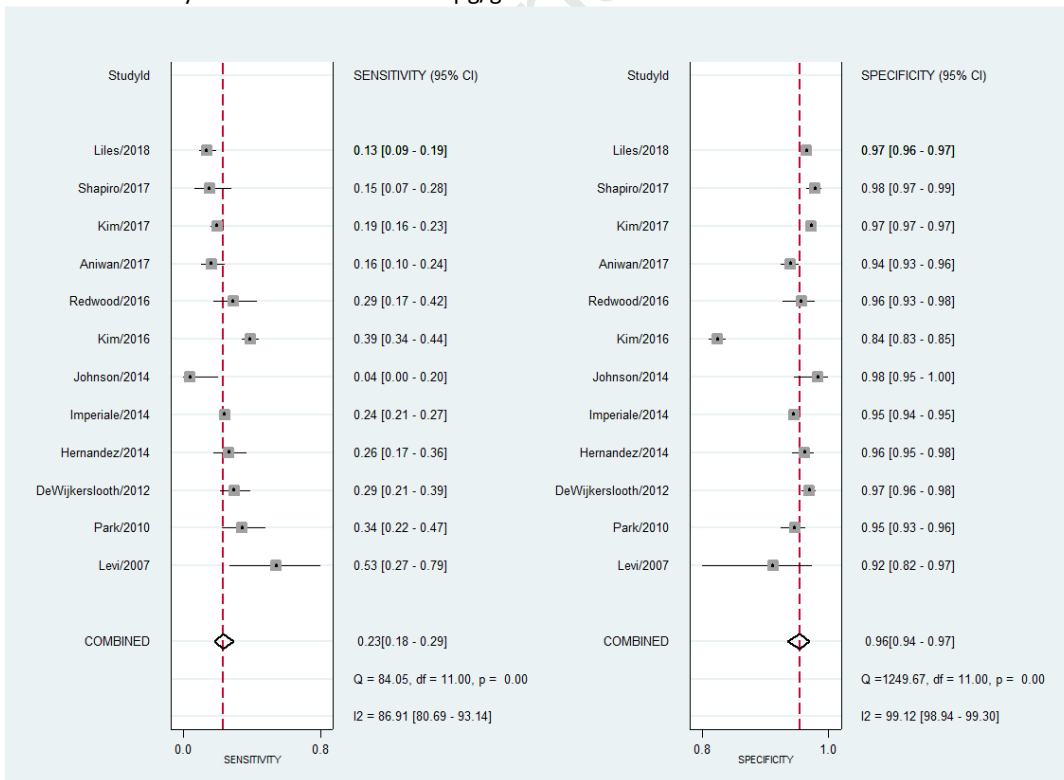

Supplemental materials for “Accuracy of the Quantitative Fecal Immunochemical Test...”

Figures 12A-B: Colorectal cancer detection in studies that stratified by sex and age. Details of studies in Table 3.

A. Sensitivity and specificity stratified by sex. 1=women, 0=men

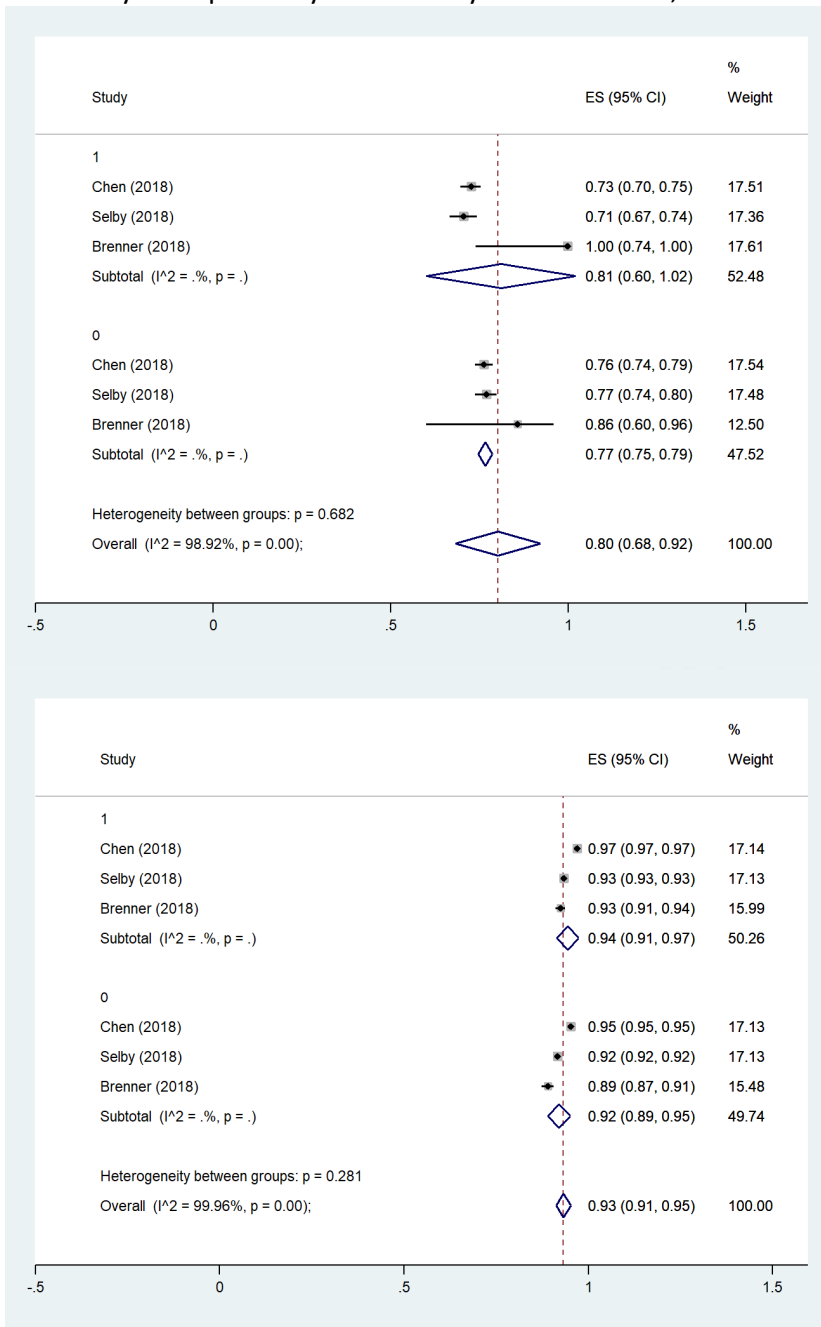

Supplemental materials for “Accuracy of the Quantitative Fecal Immunochemical Test...”

B. Sensitivity and specificity stratified by sex. 1=60-69 years, 0=50-59 years

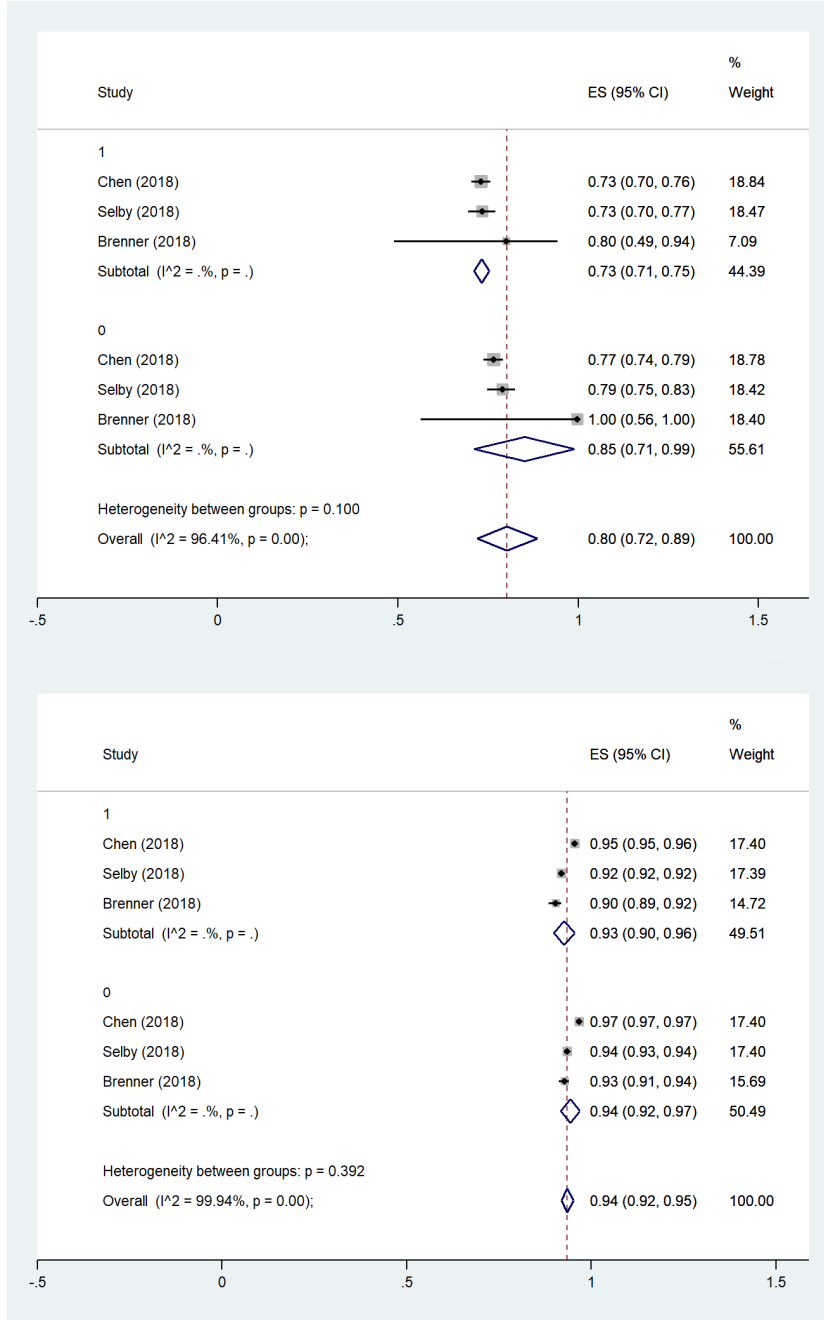

Supplement: NIHMS1538094-supplement-2.pdf [file NIHMS1538094-supplement-2.pdf]
