# Supplementary material
Source: PubMed Central journal article supplement (PMC6878177)
Supplement: NIHMS1538094-supplement-supplemental_tables_6_and_7.pdf [file NIHMS1538094-supplement-supplemental_tables_6_and_7.pdf]

Supplemental materials for “Accuracy of the Quantitative Fecal Immunochemical Test...”

Table 6: Diagnostic performance of the fecal immunochemical test (FIT) for the detection of advanced neoplasia (AN) by sex

| Author and FIT brand                                     | Cutoff, $\mu\text{g/g}$ | Sensitivity in % (95%CI) |                 |      | Specificity in % |                 |      |
|----------------------------------------------------------|-------------------------|--------------------------|-----------------|------|------------------|-----------------|------|
|                                                          |                         | Men                      | Women           | Diff | Men              | Women           | Diff |
|                                                          |                         | N=68                     | n=51            |      |                  |                 |      |
| Grobbee et al, 2017<br>UEG Journal<br>OC-Sensor          | 20                      | 29.4<br>(19-42)          | 33.3<br>(21-48) | -3.9 | 96.4<br>(95-98)  | 97.5<br>(96-99) | -1.1 |
|                                                          |                         | N=177                    | N=134           |      |                  |                 |      |
| Brenner et al, 2018<br>Clinical Epidemiology<br>FOB Gold | 17                      | 41.8<br>(34-49)          | 40.3<br>(32-49) | 1.5  | 92.3<br>(91-94)  | 94.7<br>(93-96) | -2.4 |
|                                                          |                         | N=19                     | N=19            |      |                  |                 |      |
| Khalid-de Bakker, 2011<br>Cancer Prev Res<br>OC-Sensor   | 10                      | 26.3<br>(9-51)           | 5.3<br>(0-26)   | 21.0 | 95.8<br>(90-99)  | 97.7<br>(94-99) | -1.9 |
|                                                          |                         | N=155                    | N=88            |      |                  |                 |      |
| Brenner et al, 2010,<br>Am J Gastroenterol<br>RIDASCREEN | 2                       | 47.7<br>(40-56)          | 30.7<br>(21-41) | 17.0 | 85.0<br>(83-87)  | 89.5<br>(88-91) | -4.5 |

Table 7: Diagnostic performance of the fecal immunochemical test (FIT) for the detection of advanced neoplasia (AN) by age

| Author                                                   | Cutoff | Sensitivity in % |                  |       | Specificity in % |                 |      |
|----------------------------------------------------------|--------|------------------|------------------|-------|------------------|-----------------|------|
|                                                          |        | 50-64 years      | 65-79 years      | Diff  | 50-64 years      | 65-79 years     | Diff |
|                                                          |        | N=190            | N=121            |       |                  |                 |      |
| Brenner et al, 2018<br>Clinical Epidemiology<br>FOB Gold | 17     | 34.7<br>(28-42)  | 51.2<br>(42-60)  | -16.5 | 94.8<br>(94-96)  | 91.0<br>(89-93) | 3.8  |
|                                                          |        | <55 years        | $\geq$ 55 years  |       | <55 years        | $\geq$ 55 years |      |
|                                                          |        | N=21             | N=17             |       |                  |                 |      |
| Khalid-de Bakker, 2011<br>Cancer Prev Res<br>OC-Sensor   | 10     | 9.5<br>(1 - 30)  | 23.5<br>(7 - 50) | -14.0 | 96.7<br>(93-99)  | 97.1<br>(93-99) | -0.4 |
